# Supplementary material for: Meeting climate targets by direct CO 2 injections:What price would the ocean have to pay?
Source: Copernicus journal article supplement (doi:10.5194/esd-2018-87), 2019-03-01
Supplement: Supplementary file 1 [file esd-2018-87-supplement.pdf]

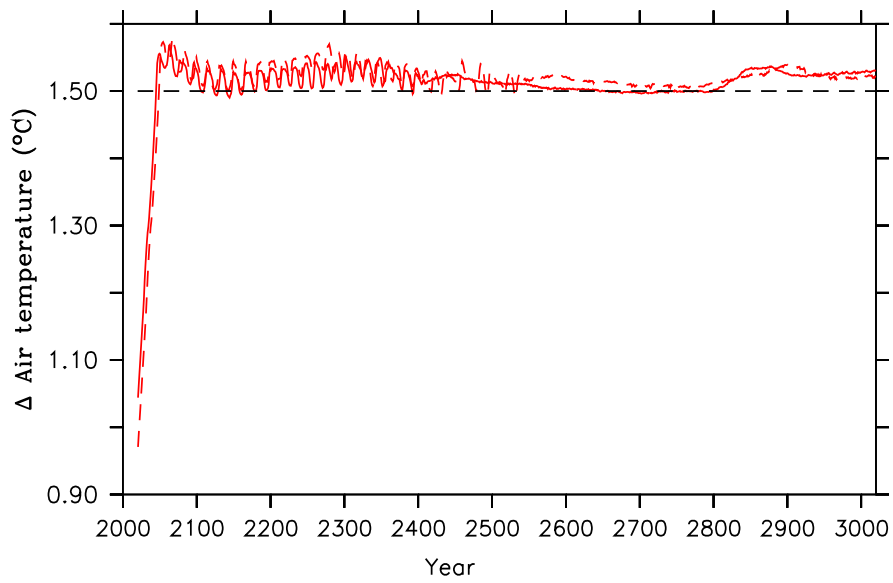

**Figure S1:** Global mean surface air temperature, relative to preindustrial, of the A1\_Comitw simulation (solid) and the A1\_Comitw\_sed run (dashed). The horizontal dashed black line denotes the 1.5°C climate target.

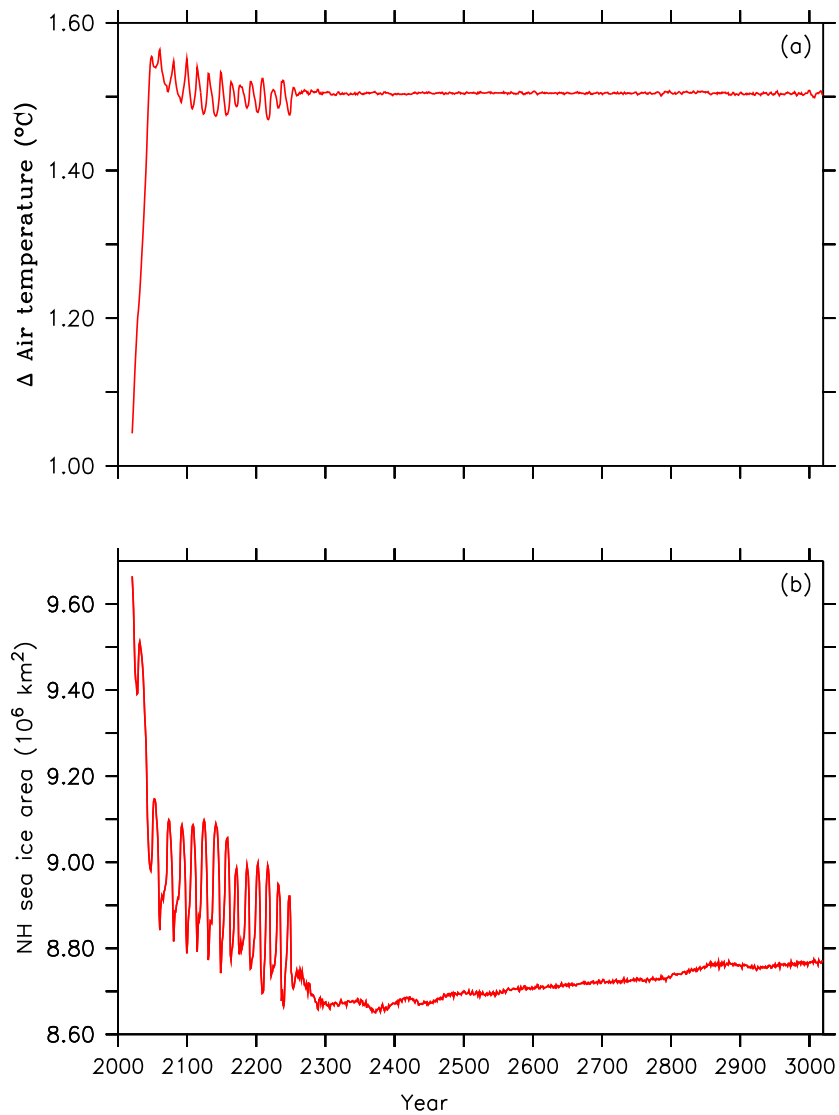

**Figure S2:** Time-series of the default A2 simulation for (a) global mean surface air temperature, relative to preindustrial, and (b) northern hemisphere (NH) sea ice area.

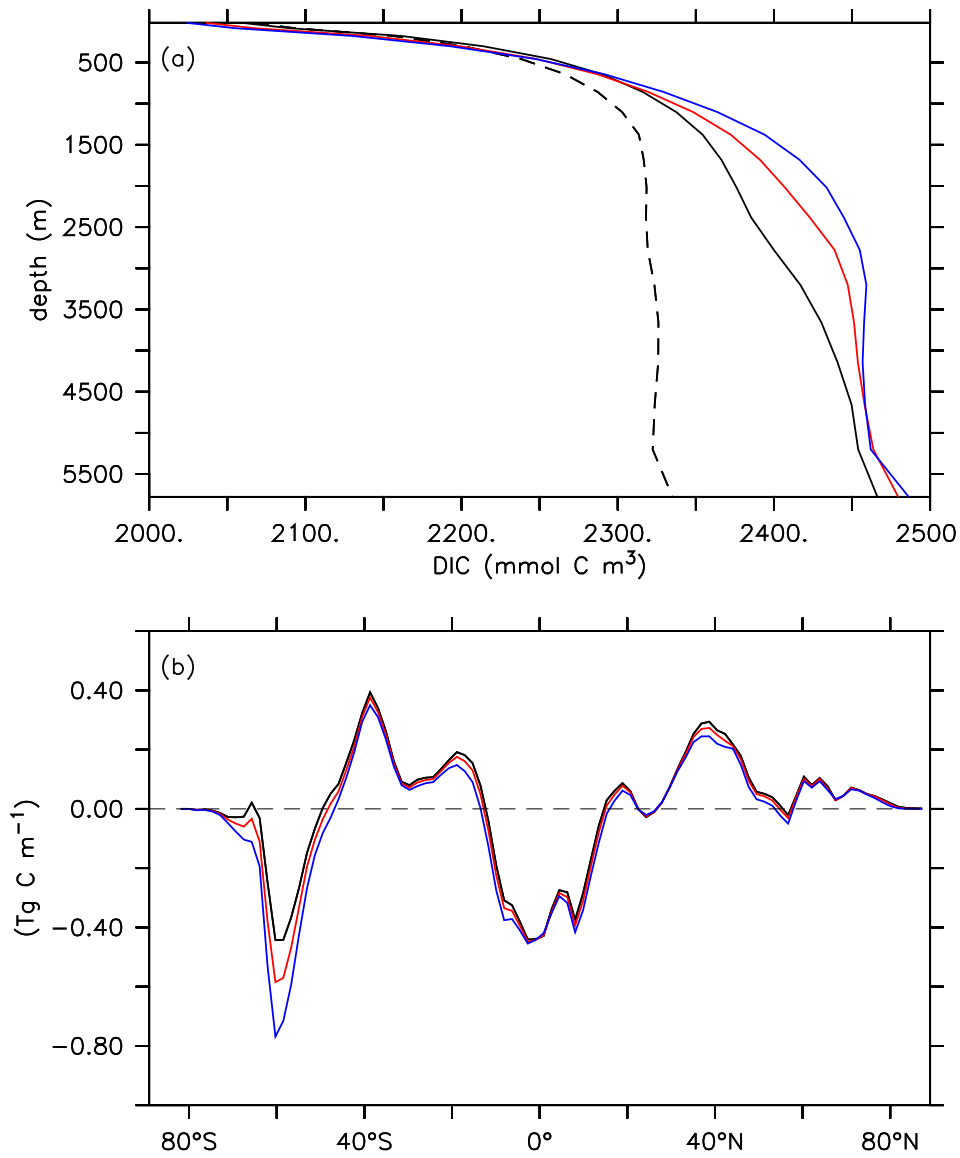

**Figure S3:** Comparison between the different default injection experiments, i.e., A1 simulation (black lines), A2 simulation (red lines) and the A3 simulation (blue lines) for **(a)** global mean profile of DIC in year 2020 (dashed black line) and global mean profiles in year 3020 (solid lines), and **(b)** cumulative atmosphere-to-ocean carbon flux in year 3020.

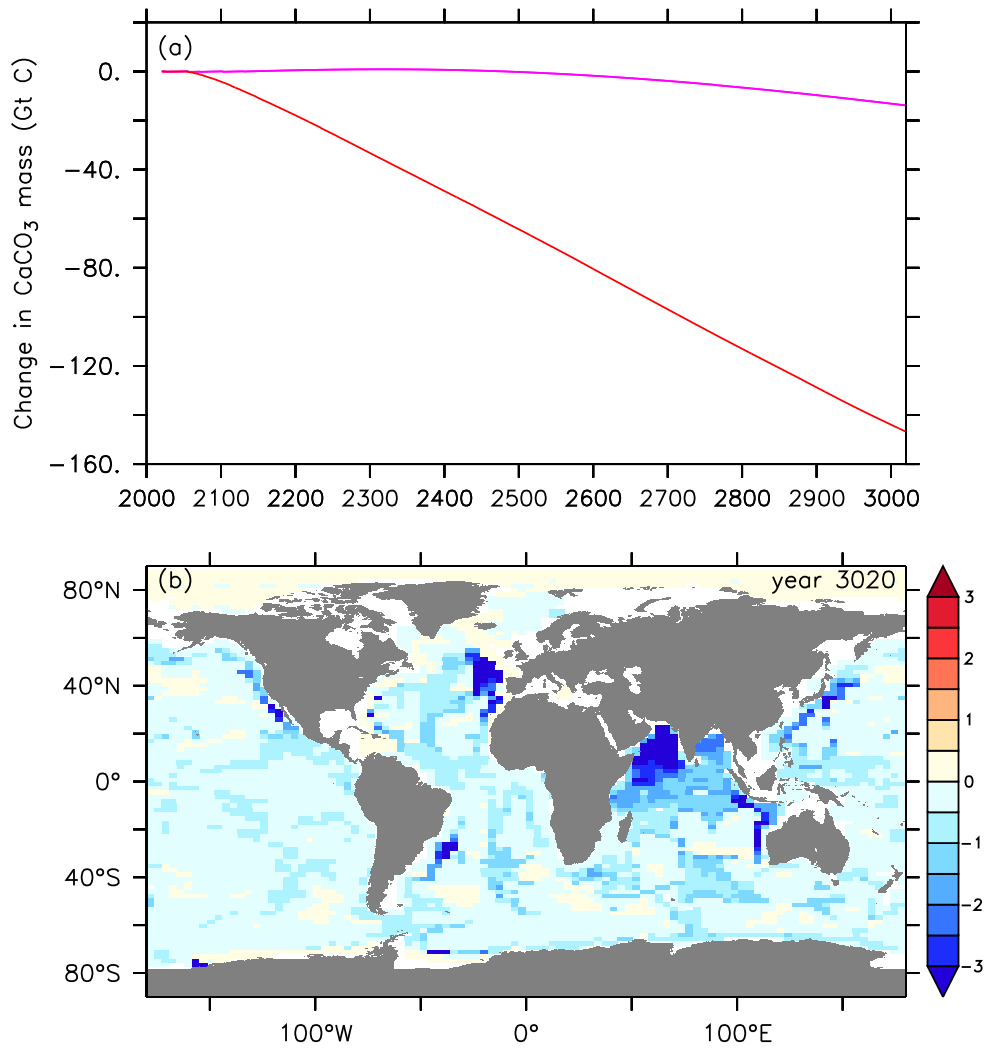

**Figure S4:** (a) Time-series of change in CaCO<sub>3</sub> mass for the RCP 4.5 control\_sed simulation (purple line) and the A2\_sed run, relative to the year 2020, and (b) global distribution of change in CaCO<sub>3</sub> mass (Kg C/m<sup>2</sup>) in the 1.5°C\_target\_sed run (year 3020 minus year 2020).
