# Supplementary material for: Meeting climate targets by direct CO 2 injections:What price would the ocean have to pay?
Source: Copernicus journal article supplement (doi:10.5194/esd-2018-87), 2019-03-01
Supplement: Supplementary file [file esd-2018-87-AC2-supplement.pdf]

## ***Responses to Reviewer#1 in Italic***

*First of all, the authors thank the reviewer very much for her/his thoughtful and constructive suggestions.*

In this study, the authors used an Earth system model of intermediate complexity, UVic, to investigate the effect of direct CO<sub>2</sub> injection on atmospheric CO<sub>2</sub>, temperature, and ocean acidification. Under the reference CO<sub>2</sub> emission scenario of RCP4.5, CO<sub>2</sub> is injected directly in the form of dissolved inorganic carbon into deep sea sites around 3000m to limit global warming below 1.5 K. Three injection strategies are designed and simulated: 1) once global mean warming exceeds 1.5K, all further emission are injected into the deep ocean; 2) inject CO<sub>2</sub> into the deep ocean in an amount to keep global mean warming below 1.5K; 3) inject CO<sub>2</sub> into the deep ocean in an amount such that atmospheric CO<sub>2</sub> follows the concentration pathway of RCP 2.6. In all injection scenarios, substantial amount of CO<sub>2</sub> outgassing is found, indicating that a significant amount of carbon leakage needs to be re-injected to achieve the mitigation goals. With respect to the biogeochemical effects, it is found that CO<sub>2</sub> injection into the deep ocean mitigate surface acidification, but at the cost of more acidified water in the deep ocean, in particular in the vicinity of the injection sites. This study is well-defined and the analysis is comprehensive and in-depth. This study makes a useful contribution to the assessment of climate and environmental effect of direct CO<sub>2</sub> injection. I have a few suggestions that the authors may want to take into consideration:

1) The mitigation scenario of RCP 4.5 is used as the reference scenario for all injection experiments. It would be illustrative to demonstrate the effect of direct CO<sub>2</sub> injection under higher emission scenarios (i.e., RCP 8.5). To achieve the same mitigation goals, deep ocean would be much more acidified, and presumably, more CO<sub>2</sub> would be outgassed from the deep ocean.

*Thank you for this very interesting point. We have also considered conducting a direct CO<sub>2</sub> injection (oceanic CCS) experiment under the RCP 8.5 CO<sub>2</sub> emission scenario such as in the study of Reith et al. (2016) in order to compare the Earth system response to the ones under the RCP 4.5 CO<sub>2</sub> emission scenario. However, we feel that such an oceanic CCS experiment does not really fit into the framing of our study, i.e., meeting climate targets. Any future emission trajectory close to the RCP 8.5 CO<sub>2</sub> emission scenario assumes that almost no climate policies are in place, implying that relatively costly oceanic CCS would not be undertaken. Oceanic CCS with estimated cost units of about 100 USD/tCO<sub>2</sub> (IPCC, 2005) would only be considered as an option if other less costly emission mitigation options such as switching to renewable energies and increasing insulation in houses have been fully utilized so that CO<sub>2</sub> emissions have been reduced to coincide with the RCP 4.5 or even RCP 2.6 CO<sub>2</sub> emission scenario. Only CO<sub>2</sub> emission mitigation scenarios like the RCP 4.5 or in particular the RCP 2.6 CO<sub>2</sub> emission scenario imply implicit carbon prices above 100 USD/tCO<sub>2</sub> (Clarke et al., 2014), making options like oceanic CCS attractive to supplement conventional CO<sub>2</sub> emission control such as the National Determined Contributions of the Paris Agreement. Accordingly, we would like to restrict our analysis to the implementation of oceanic CCS to climate policy relevant scenarios.*

2) In terms of deep ocean acidification, the authors may want to look at the evolution of aragonite (calcite) saturation horizon.

*Thank you for this suggestion. We have looked at the evolution of the aragonite saturation horizon (ASH) in the RCP 4.5 control run and our A2 experiment. In comparison to the beginning of the RCP 4.5 control run (Fig. R1), the strongest shallowing of the ASH in the RCP 4.5 control run by the year 2100 appears in some down- and upwelling regions (Fig. R2), which is due to deeper penetration and higher concentrations of anthropogenic CO<sub>2</sub> (e.g., Orr et al., 2005).*

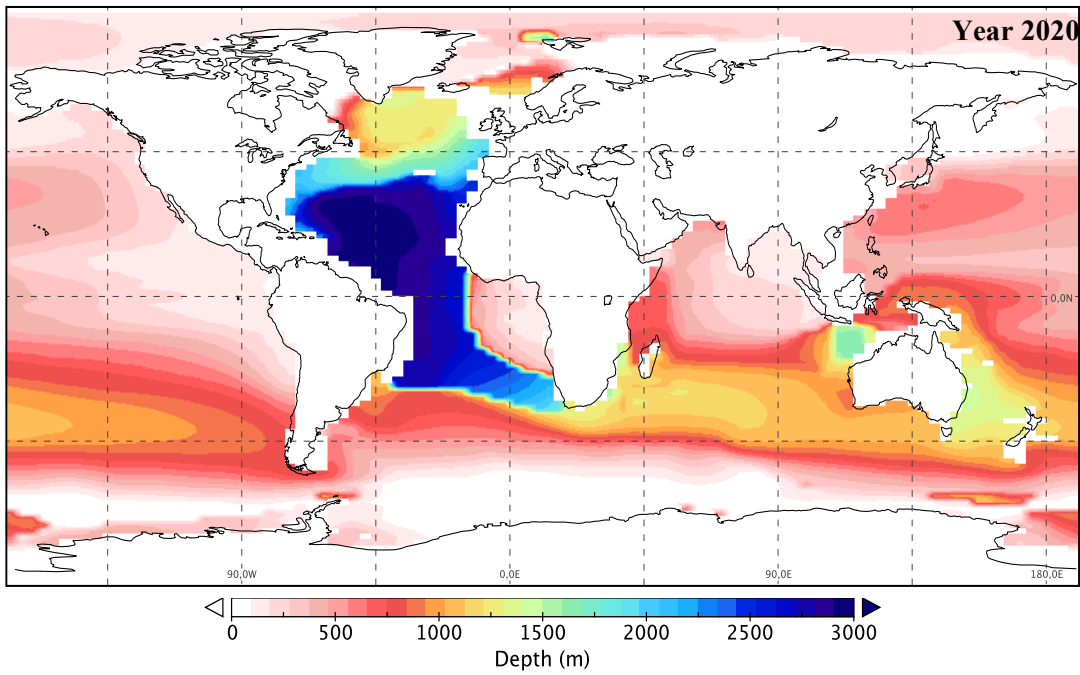

**Figure R1:** Depth of aragonite saturation horizon (ASH) at the beginning of the RCP 4.5 control run (year 2020).

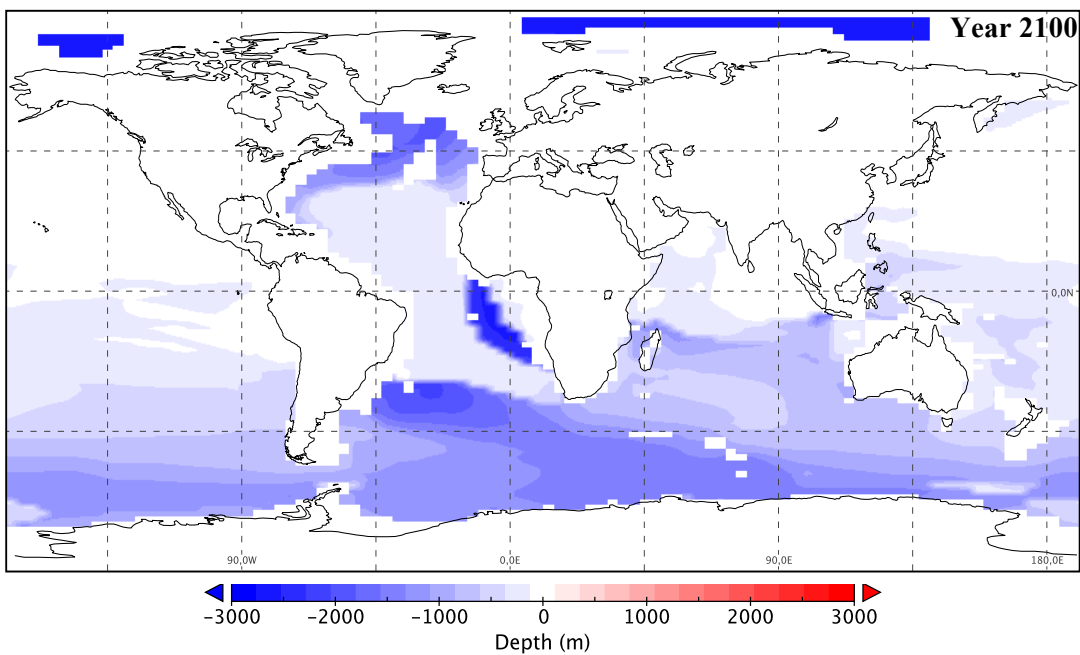

**Figure R2:** Relative changes in depth of aragonite saturation horizon (ASH) in the RCP 4.5 control run in 2100, i.e., year 2100 minus year 2020.

*With respect to the A2 experiment, we find an accelerated shoaling of the ASH in the Atlantic and smaller changes in the Pacific and Indian Ocean by the year 2100, when compared to the respective changes in the RCP 4.5 control run (Fig. R3). This can be explained by the fact that injections in the Pacific and Indian Ocean were carried out in waters already beneath the simulated ASH, which occurred at a depth of about 600 - 1200 m during the injection period (Fig. R1). This is in contrast to the Atlantic injection sites where the simulated ASH was at a depth of about 3000 m at the beginning of the simulated injections (Fig. R1), thus causing the simulated increase in the volume of undersaturated water. Consequently, the injections*

could have, for example, additional implications for the distribution of aragonite forming deep-sea scleractinian corals (Guinotte et al., 2006) in the Atlantic. Furthermore, it is likely that the accelerated shoaling of the saturation horizons for aragonite (and calcite) in the Atlantic due to the injections would drive a change in habitat quality for a variety of deep-sea calcifiers (Orr et al., 2005).

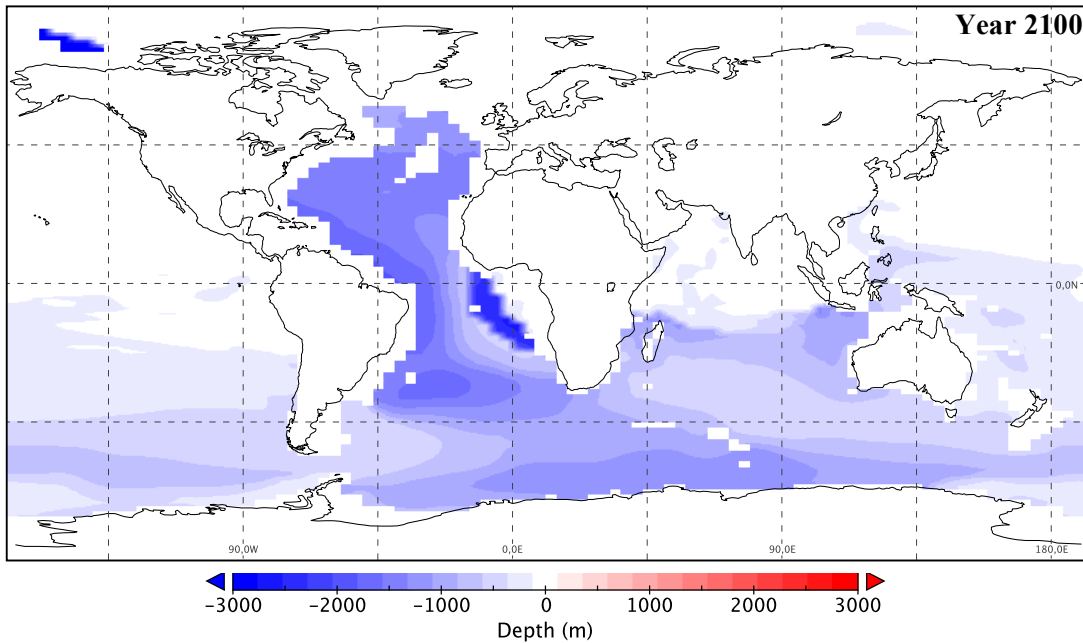

**Figure R3:** Relative changes in depth of aragonite saturation horizon (ASH) between the A2 simulation (year 2100) and the RCP 4.5 control run (year 2020).

By the end of the simulations (year 3020), we observe similar changes in the ASH in the RCP4.5 control run when compared to the A2 experiment, although with a slightly higher shallowing of the ASH in the Pacific and Indian Ocean (Figs. R4-5).

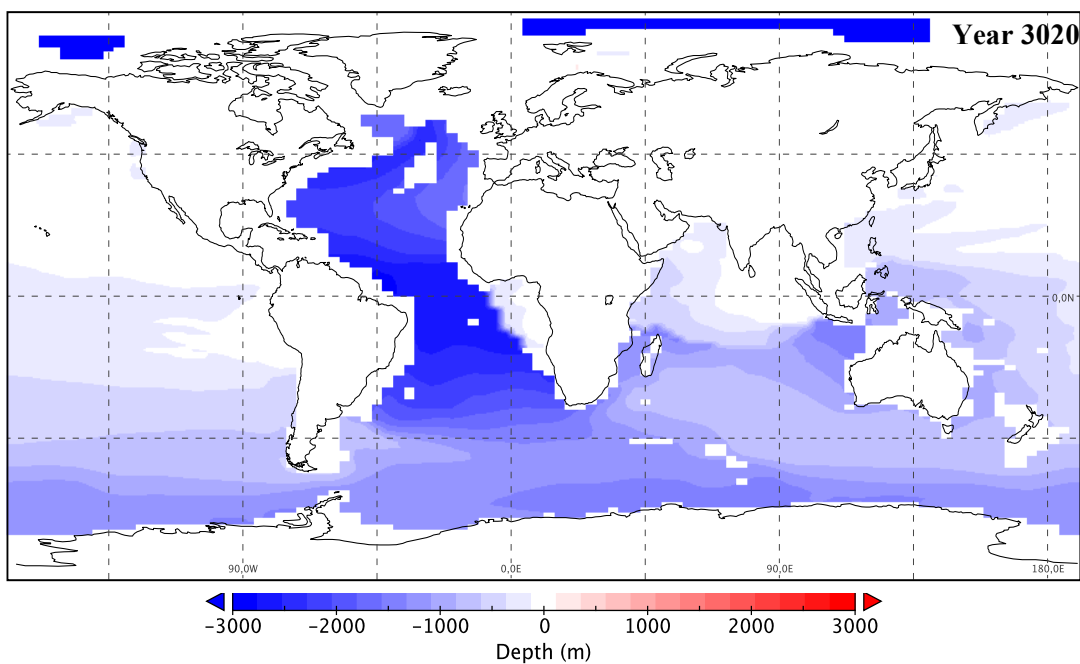

**Figure R4:** Relative changes in depth of aragonite saturation horizon (ASH) in the RCP 4.5 control run in 3020, i.e., year 3020 minus year 2020.

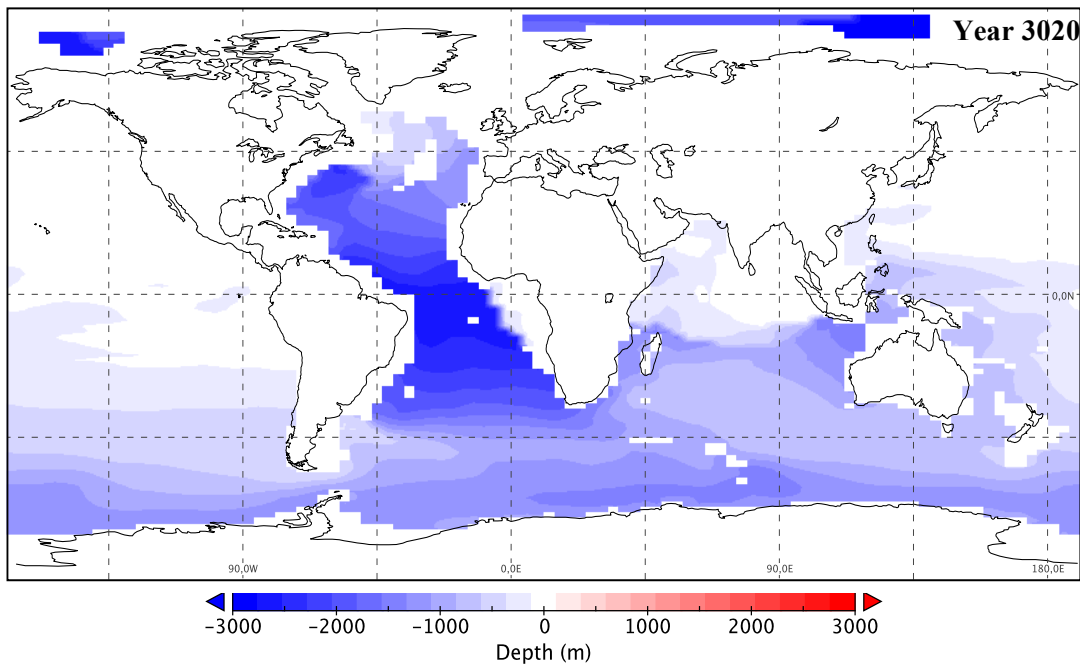

**Figure R5:** Relative changes in depth of aragonite saturation horizon (ASH) between the A2 simulation (year 3020) and the RCP 4.5 control run (year 2020).

*The authors feel that the biogeochemical part (section 3.3) in the submitted version of the manuscript is already very long and complex. To address this issue, we suggest adding the following paragraph and Figures R1-5 to the Supplement.*

*The new supplemental text reads:*

*“With respect to the evolution of the aragonite saturation horizon ( $\Omega_{AR}=1$ , ASH) after the beginning of the RCP 4.5 control run (Fig. S5), we observe that the ASH is mainly affected in down- and upwelling regions by the year 2100 (Fig. S6). This is caused by the deeper penetration and higher concentrations of the respective  $CO_2$  emissions (e.g., Orr et al., 2005). With respect to the A2 experiment, we find an accelerated shoaling of the ASH in the Atlantic and smaller changes in the Pacific and Indian Ocean by the year 2100, when compared to the respective changes in the RCP 4.5 control run (Fig. S7). This can be explained by the fact that injections in the Pacific and Indian Ocean were carried out in waters already beneath the simulated ASH, which occurred at a depth of about 600 - 1200 m during the injection period (Fig. S5). This is in contrast to the Atlantic injection sites where the simulated ASH was at a depth of about 3000 m at the beginning of the simulated injections (Fig. S5), thus causing the simulated increase in the volume of undersaturated water. Consequently, the injections could have, for example, additional implications for the distribution of aragonite forming deep-sea scleractinian corals (Guinotte et al., 2006) in the Atlantic. Furthermore, it is likely that the accelerated shoaling of the saturation horizons for aragonite (and calcite) in the Atlantic due to the injections would drive a change in habitat quality for a variety of deep-sea calcifiers (Orr et al., 2005). By the end of the simulations (year 3020), we observe similar changes in the ASH in the RCP4.5 control run when compared to the A2 experiment, although with a slightly higher shallowing of the ASH in the Pacific and Indian Ocean (Figs. S8-9). We find nearly the same evolution pattern of the ASH in the A3 experiment (not shown).”*

*We have also added a sentence in the manuscript referring to this supplementary section and Figs. S5-9. The new text (lines 435:437) reads:*

See Sect.1 and Figs. S5-9 in the Supplement about the evolution of the aragonite saturation horizon ( $\Omega_{AR}=1$ , ASH) in the RCP 4.5 control run and the A2 and A3 experiments.

3) What is the role of land carbon cycle here? How much of the outgassed CO<sub>2</sub> can be attributed to (or compensated by) the terrestrial CO<sub>2</sub> flux? Can the land carbon cycle feedback be quantified by turning on/off the UVic land carbon component?

*Thank you for this interesting point. The response of the land carbon cycle due to an injection-related atmospheric carbon reduction is mainly governed by the reduced CO<sub>2</sub> fertilization effect on net primary productivity and the temperature related decrease in heterotrophic soil respiration, which is something that we investigated in Reith et al., 2016. However, feedbacks from the terrestrial system to changes in atmospheric CO<sub>2</sub> are among the largest uncertainties (e.g., Schimel et al., 2015). In order to attribute the terrestrial carbon cycle response to the outgassed amount of injected CO<sub>2</sub>, we would need to perform partially coupled simulations, i.e., simulations with only the carbon cycle model components experiencing rising CO<sub>2</sub> (biogeochemically (BGC) coupled) and only the radiation model components experiencing rising CO<sub>2</sub> (radiatively (RAD) coupled) (e.g. Schwinger et al., 2014). Not having these idealized model experiments, it can be stated that the difference between experiments A1 and A2 (a net loss of carbon from land in the successful (climate target) A2 experiment of about 100 Gt C, Fig. R6) is part of the additional carbon injected in experiment A2 compared to experiment A1.*

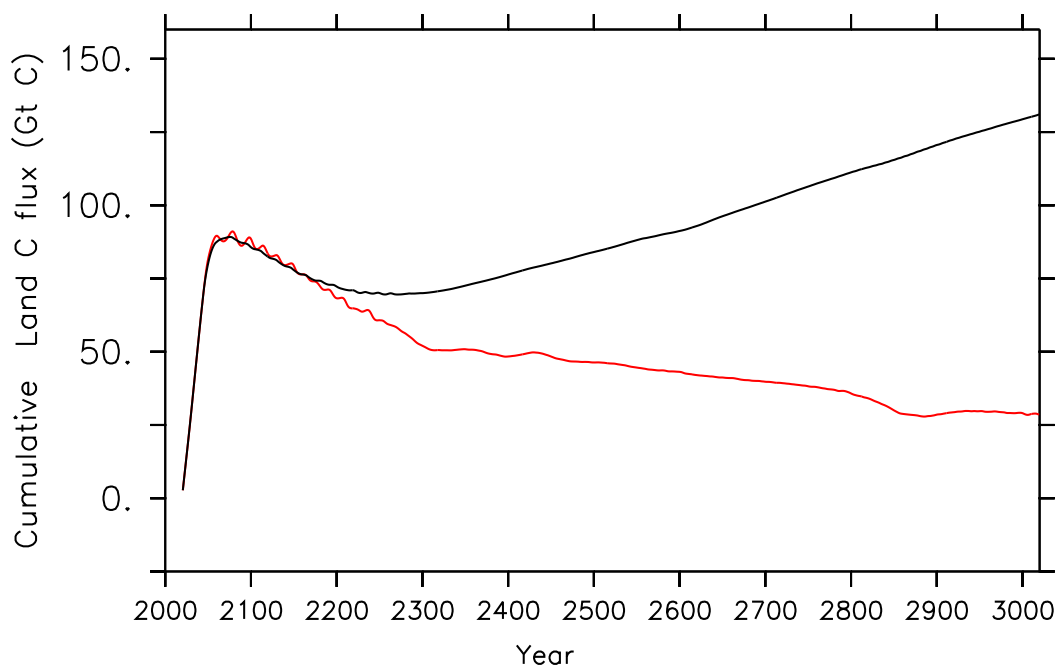

**Figure R6:** Cumulative land fluxes (Gt C) for the A1 simulation (black line) and the A2 simulation (red line).

*No, the land carbon cycle feedbacks cannot easily be quantified by turning on/off the land component of the UVic model. This is in particular due to the fact that the applied RCP 4.5 CO<sub>2</sub> emission scenario includes historical land-use carbon emissions (line 114), which would lead to a different climate response if it was used when the land component was switched off. Further, in a coupled system like the UVic model turning off a single component will affect the remaining system. Thus, determining the terrestrial role by such additional experiments would require a noLand model spinup and modification of the RCP 4.5 emission scenario so that it reproduces a climate response consistent with the response to the full RCP 4.5 emissions in the fully coupled model. Thereafter, one could repeat the model runs with this noLand version. Then, to disentangle and quantify the terrestrial processes involved, we would further need to separately perform additional partially coupled runs (only biogeochemically coupled and only radiatively coupled simulations). As the terrestrial biosphere has little influence on the cumulative CO<sub>2</sub> injections (Reith et al., 2016), we are convinced that we would not gain any important insights from such time-consuming experiments.*

We added a new subsection (3.1.2 Land response) to the manuscript in order to better address this issue.

The new text (lines 285:297) reads:

“Biological processes primarily control the exchange of atmospheric CO<sub>2</sub> with the land, where the majority of the carbon is stored in soils and permafrost. CO<sub>2</sub> is removed from the atmosphere by plant photosynthesis and primarily returned to the atmosphere by respiration and other processes such as fire (Ciais et al., 2013). As long as primary production (GPP; i.e. gross photosynthetic carbon fixation) is greater than carbon losses due to respiration and processes such as fire, the land will be a carbon sink (Le Quere et al., 2016). If this balance changes then the land can become a source of CO<sub>2</sub> to the atmosphere. In our simulations as emissions increase and decrease (with oceanic CCS), eventually reaching net negative- and/or zero- emission, the terrestrial carbon cycle is perturbed and can switch from a sink to a source. The magnitude of the land carbon cycle response due to an injection-related atmospheric carbon reduction, and eventual increase as in the A1 experiment, (see Section 3.1) is mainly governed by the reduced CO<sub>2</sub> fertilization effect on net primary productivity and the temperature related change in heterotrophic soil respiration, responses that have been investigated in Reith et al., 2016. In all simulations the land changes from a carbon sink to source, eventually reaching almost a balance (almost zero net flux) in the A2 and A3 simulations. In the A1 simulation, the increase in atmospheric CO<sub>2</sub> after a period of decline (Fig. 1 c) is not able to overcome the temperature effect that elevates respiration rates and the land continues to perennially lose carbon.”

#### References:

- Ciais, P., Sabine, C., Bala, G., Bopp, L., Brovkin, V., Canadell, J., Chhabra, a, DeFries, R., Galloway, J., Heimann, M., Jones, C., Quéré, C. Le, Myneni, R. B., Piao, S. and Thornton, P.: Carbon and Other Biogeochemical Cycles, *Clim. Chang.*, 2013 - *Phys. Sci. Basis*, doi:10.1017/CBO9781107415324.015, 2013.
- Clarke, L. E., Jiang, K., Akimoto, K., Babiker, M., Blanford, G., Fisher-Vanden, K., Hourcade, J.-C., Krey, V., Kriegler, E., Löschel, A., McCollum, D., Paltsev, S., Rose, S., Shukla, P. R., Tavoni, M., van der Zwaan, B. C. C. and van Vuuren, D. P.: Assessing transformation pathways, *Clim. Chang. 2014 Mitig. Clim. Chang. Contrib. Work. Gr. III to Fifth Assess. Rep. Intergov. Panel Clim. Chang.*, 413–510, 2014.
- Guinotte, J. M., Orr, J., Cairns, S., Freiwald, A., Morgan, L. and George, R.: Will human-induced changes in seawater chemistry alter the distribution of deep-sea scleractinian corals?, *Front. Ecol. Environ.*, 4(3), 141–146, doi:10.1890/1540-9295(2006)004[0141:WHCISC]2.0.CO;2, 2006.
- IPCC: IPCC Special Report on Carbon Dioxide Capture and Storage, Prepared by Working Group III of the Intergovernmental Panel on Climate Change, edited by: Metz, B., Davidson, O., de Coninck, H. C., Loos, M., and Meyer, L. A., Cambridge University Press, Cambridge, United Kingdom and New York, NY, USA, 442 pp., 2005.
- Le Quere, C., Andrew, R. M., Canadell, J. G., Sitch, S., Ivar Korsbakken, J., Peters, G. P., Manning, A. C., Boden, T. A., Tans, P. P., Houghton, R. A., Keeling, R. F., Alin, S., Andrews, O. D., Anthoni, P., Barbero, L., Bopp, L., Chevallier, F., Chini, L. P., Ciais, P., Currie, K., Delire, C., Doney, S. C., Friedlingstein, P., Gkritzalis, T., Harris, I., Hauck, J., Haverd, V., Hoppema, M., Klein Goldewijk, K., Jain, A. K., Kato, E., Körtzinger, N., Lenton, A., Lienert, S., Lombardozzi, D., Melton, J. R., Metzl, N., Millero, F., Monteiro, P. M. S., Munro, D. R., Nabel, J. E. M. S., Nakaoka, S. I., O'Brien, K., Olsen, A., Omar, A. M., Ono, T., Pierrot, D., Poulter, Salisbury, J., Schuster, U., Schwinger, J., R., Skjelvan, I., Stocker, B. D., Sutton, A. J., Takahashi, T., Tian, H., Tilbrook, B., Van Der Laan-Luijckx, I. T., Van Der Werf, G. R., Viovy, N., Walker, A. P., Wiltshire, A. J. and Zaehle, S.: Global Carbon Budget 2016, *Earth Syst. Sci. Data*, 8(2), doi:10.5194/essd-8-605-2016, 2016.

- Orr, J. C., Fabry, V. J., Aumont, O., Bopp, L., Doney, S. C., Feely, R. a, Gnanadesikan, A., Gruber, N., Ishida, A., Joos, F., Key, R. M., Lindsay, K., Maier-Reimer, E., Matear, R., Monfray, P., Mouchet, A., Najjar, R. G., Plattner, G.-K., Rodgers, K. B., Sabine, C. L., Sarmiento, J. L., Schlitzer, R., Slater, R. D., Totterdell, I. J., Weirig, M.-F., Yamanaka, Y. and Yool, A.: Anthropogenic ocean acidification over the twenty-first century and its impact on calcifying organisms., *Nature*, 437(September), 681–686, doi:10.1038/nature04095, 2005.
- Reith, F., Keller, D. P., and Oschlies, A.: Revisiting ocean carbon sequestration by direct injection: A global carbon budget perspective, *Earth Syst. Dyn.*, 7(4), 797–812, doi:10.5194/esd-7-797-2016, 2016.
- Schimel, D., Stephens, B. B. and Fisher, J. B.: Effect of increasing CO<sub>2</sub> on the terrestrial carbon cycle, *Proc. Natl. Acad. Sci.*, 112, 436–441, doi:10.1073/pnas.1407302112, 2015.



## Responses to Reviewer#2 in Italic

*First of all, the authors thank the reviewer very much for his thoughtful and constructive comments.*

CO<sub>2</sub> emissions are increasing at an unprecedented rate into the earth's atmosphere. By and large, global political leadership have recognized the consequences of such emissions for human kind and ecosystems. As a result, the 2015 Paris Agreement has set the target of limiting global warming to below 2°C. To achieve such a target, academicians have been discussing some unconventional methods – known as geoengineering. To the same effect, in this study, Reith and co-workers have presented this excellent and very thorough analysis of consequences of injecting atmospheric CO<sub>2</sub> into the deep oceans. Their analysis looks robust (I am not a modeller though!). I have just a couple of comments that might be discussed in the revised version of the manuscript:

1. I am not sure if the trade-off between the amount of CO<sub>2</sub> released back to the atmosphere in collecting CO<sub>2</sub> from the atmosphere and injecting it into the deep CO<sub>2</sub> has been considered. By which way(s) the atmospheric CO<sub>2</sub> can be collected from the atmosphere and put into the deep ocean, and how much CO<sub>2</sub> will be emitted back (through the instruments used for such huge task) to achieve both the actions. I know this might not be feasible to incorporate in the model but it needs to be discussed/ mentioned.

*Thank you for this important aspect. As mentioned in the introduction (lines 80:81), we consider direct CO<sub>2</sub> injections as oceanic CCS, depositing CO<sub>2</sub> from point sources such as fossil fuel or biomass-based power plants or direct air capture plants. The direct CO<sub>2</sub> injections are based on the OCMIP carbon sequestration protocols (see Orr et al., 2001; 2004) and carried out in an idealized manner by adding CO<sub>2</sub> directly to the dissolved inorganic carbon (DIC) pool (lines 121:122). Beforehand the captured CO<sub>2</sub> would have to be transported to the seven injection sites via pipeline or ship and then injected into the deep ocean, which would also apply to recaptured CO<sub>2</sub> that has outgassed in order to maintain the desired climate target. However, the technological feasibility and development of CO<sub>2</sub> removal methods is to date in their infancy und hence uncertain regarding their effectiveness, costs, side effects and carbon cycle implications (e.g., Field and Mach, 2017). Nevertheless, required infrastructural processes for deploying oceanic CCS in reality would very likely imply additional costs in terms of CO<sub>2</sub> emissions that would need to be accounted for in order to maintain a desired climate target. Accordingly, we should have made clearer that we do not account for the trade-off between the amount of CO<sub>2</sub> released back to the atmosphere in collecting CO<sub>2</sub> from the atmosphere and injecting it into the deep ocean. We have rephrased a sentence in the introduction to clarify this. The new text (lines 89:93) reads:*

*“Note that we neglect the effects of non-CO<sub>2</sub> forcing agents as well as any additional costs and trade-off in terms of CO<sub>2</sub> emissions caused by the carbon capture and injections (e.g., through implementation of required infrastructure for deploying oceanic CCS). Consequently, our results provide a lower limit estimate, i.e. the cumulative CO<sub>2</sub> amount that would need to be at least injected into the deep ocean in order to comply with the desired target”.*

2. Can (gas chromatographically) CO<sub>2</sub> alone be collected from the atmosphere on such a large scale? Or will CO<sub>2</sub> be part of the mixture of all the atmospheric gases and particles (aerosols)? Was the model tuned for injecting of natural air rather than only CO<sub>2</sub> into the deep ocean? How sensitive mixture would become for ocean chemistry?

*Thank you for this interesting point. Yes, it is possible to extract only CO<sub>2</sub> out of the atmosphere by means of Carbon Dioxide Removal methods such as bioenergy with carbon capture and storage and direct air capture with carbon storage (National Research Council, 2015; Sanz-Pérez et al., 2016; Wilcox et al., 2017). However, if it would be feasible to remove CO<sub>2</sub> alone on such a large scale required to achieve a specific climate target is to date uncertain (e.g., Field and Mach, 2017).*



As mentioned above the simulated CO<sub>2</sub> injections are based on the OCMIP carbon sequestration protocols (see Orr et al., 2001; Orr, 2004) and carried out in an idealized manner by adding CO<sub>2</sub> directly to the dissolved inorganic carbon (DIC) pool, thus neglecting any gravitational effects and assuming that the injected CO<sub>2</sub> instantaneously dissolves into seawater and is transported quickly away from the injection point and distributed homogeneously over the entire model grid box with lateral dimensions of a few hundred kilometers and many tens of meters in the vertical direction (Reith et al., 2016). Consequently, the formation of CO<sub>2</sub> plumes or lakes as well as the potential risk of fast rising CO<sub>2</sub> bubbles are neglected (IPCC, 2005; Bigalke et al., 2008) (lines 122:127).

### References:

- Bigalke, N. K., Rehder, G. and Gust, G.: Experimental investigation of the rising behavior of CO<sub>2</sub> droplets in seawater under hydrate-forming conditions, *Environ. Sci. Technol.*, 42(14), 5241–5246, doi:10.1021/es800228j, 2008.
- Field, C. B. and Mach, K. J.: Rightsizing carbon dioxide removal, *Science (New York, N.Y.)*, 356, 706–707, doi:10.1126/science.aam9726, 2017.
- IPCC: IPCC Special Report on Carbon Dioxide Capture and Storage, Prepared by Working Group III of the Intergovernmental Panel on Climate Change, edited by: Metz, B., Davidson, O., de Coninck, H. C., Loos, M., and Meyer, L. A., Cambridge University Press, Cambridge, United Kingdom and New York, NY, USA, 442 pp., 2005.
- National Research Council: *Climate Intervention: Carbon Dioxide Removal and Reliable Sequestration*, National Academies Press, 2015
- Orr, J. C., Aumont, O., Yool, A., Plattner, K., Joos, F., Maier-Reimer, E., Weirig, M. -F., Schlitzer, R., Caldeira, K., Wicket, M., and Matear, R.: Ocean CO<sub>2</sub> Sequestration Efficiency from 3-D Ocean Model Comparison, in *Greenhouse Gas Control Technologies*, edited by Williams, D., Durie, B., McMullan, P., Paulson, C., and Smith, A., CSIRO, Collingwood, Australia, pp. 469-474, 2001.
- Orr, J. C.: Modelling of ocean storage of CO<sub>2</sub> - The GOSAC study, Report PH4/37, IEA Greenhouse gas R&D Programme, 96pp., 2004.
- Reith, F., Keller, D. P., and Oschlies, A.: Revisiting ocean carbon sequestration by direct injection: A global carbon budget perspective, *Earth Syst. Dyn.*, 7(4), 797–812, doi:10.5194/esd-7-797-2016, 2016.
- Sanz-Pérez, E. S., Murdock, C. R., Didas, S. A. and Jones, C. W.: Direct Capture of CO<sub>2</sub> from Ambient Air, *Chem. Rev.*, 116(19), 11840–11876, doi:10.1021/acs.chemrev.6b00173, 2016.
- Wilcox, J., Psarras, P. C. and Liguori, S.: Assessment of reasonable opportunities for direct air capture, *Environ. Res. Lett.*, 12(6), 065001, doi:10.1088/1748-9326/aa6de5, 2017.

# Meeting climate targets by direct CO<sub>2</sub> injections: What price would the ocean have to pay?

Fabian Reith<sup>1</sup>, Wolfgang Koeve<sup>1</sup>, David P. Keller<sup>1</sup>, Julia Getzlaff<sup>1</sup>, and Andreas Oschlies<sup>1</sup>

<sup>1</sup>GEOMAR Helmholtz-Centre for Ocean Research Kiel, Düsternbrooker Weg 20, 24105 Kiel, Germany

*Correspondence to:* Fabian Reith (FReith@geomar.de)

5 **Abstract.** We investigate the climate mitigation potential and collateral effects of direct injections of captured CO<sub>2</sub> into the deep ocean as a possible means to close the gap between an intermediate CO<sub>2</sub> emissions scenario and a specific temperature target, such as the 1.5°C target aimed for by the Paris Agreement. For that purpose, a suite of approaches for controlling the amount of direct CO<sub>2</sub> injections at 3000m water depth are implemented in an Earth System Model of intermediate complexity.

10 Following the representative concentration pathway RCP4.5, which is a medium mitigation CO<sub>2</sub> emissions scenario, cumulative CO<sub>2</sub> injections required to meet the 1.5°C climate goal are found to be 390 Gt C by the year 2100 and 1562 Gt C at the end of simulations, by the year 3020. The latter includes a cumulative leakage of 602 Gt C that needs to be re-injected in order to sustain the targeted global mean temperature.

CaCO<sub>3</sub> sediment and weathering feedbacks reduce the required CO<sub>2</sub> injections that comply with the 1.5°C target by about 13  
15 % in 2100 and by about 11 % at the end of the simulation.

With respect to the injection-related impacts we find that average pH values in the surface ocean are increased by about 0.13 to 0.18 units, when compared to the control run. In the model, this results in significant increases in potential coral reef habitats, i.e., the volume of the global upper ocean (0 to 130m depth) with omega aragonite > 3.4 and ocean temperatures between 21°C and 28°C, compared to the control run. The potential benefits in the upper ocean come at the expense of strongly  
20 acidified water masses at depth, with maximum pH reductions of about -2.37 units, relative to preindustrial, in the vicinity of the injection sites. Overall, this study demonstrates that massive amounts of CO<sub>2</sub> would need to be injected into the deep ocean in order to reach and maintain the 1.5°C climate target in a medium mitigation scenario on a millennium timescale, and that there is a trade-off between injection-related reductions in atmospheric CO<sub>2</sub> levels accompanied by reduced upper-ocean acidification and adverse effects on deep ocean chemistry, particularly near the injection sites.

## 25 Introduction

The Paris Agreement of December 2015 has set the political target of limiting global warming to well below 2°C, if not 1.5°C, above preindustrial levels (UNFCCC, 2015). Staying within the Paris target range is perceived as a safe limit that avoids dangerous anthropogenic climate change and ensures sustainable food production and economic development (Rockström et al., 2009; Knutti et al., 2015; Rogelj et al., 2016). As a first step towards meeting the Paris climate goals, countries  
30 have outlined national post-2020 climate action plans by submitting their Nationally Determined Contributions (NDCs) to climate mitigation in order to meet the <2°C climate target (e.g., Cléménçon, 2016). However, even if these NDCs are fully realized, it is estimated that a median warming of 2.6 to 3.1°C will occur by the year 2100 (Rogelj et al., 2016). Consequently, it is questionable whether conventional measures currently considered by individual states will be sufficient to reach and maintain the <2°C climate target (e.g., Horton et al., 2016).

35 The scientific rationale of such claims is based on observational records and results of climate models of varying complexity that have found a tight correlation between cumulative CO<sub>2</sub> emissions and global mean temperature (Allen et al., 2009; Matthews et al., 2009; MacDougall, 2016). From this transient climate response to cumulative carbon emissions (TCRE) it can be estimated that the total quota of CO<sub>2</sub> emissions from all sources (fossil fuel combustion, industrial processes and land-use change) that is compatible with a 1.5°C target will be used up in a few years at current emission rates (Knopf et al., 2017;  
40 Mengis et al., 2018), and for a 2°C target it is likely to be reached in the next 2 to 3 decades (Friedlingstein et al., 2014). Thus, the window of opportunity for deep and rapid decarbonization that would allow for such a climate target through emissions reduction alone is closing soon (Sanderson et al., 2016).

Given the very challenging and urgent nature of the task of reaching the agreed-upon Paris climate goals, unconventional methods are being discussed. Under specific consideration are negative emission technologies, i.e., measures that de-  
45 liberately remove CO<sub>2</sub> from the atmosphere (e.g., Gasser et al., 2015) and store it somewhere else, e.g., in geological reservoirs or the deep ocean (e.g., IPCC, 2005). Negative emissions are already included in all realistic scenarios from integrated assessment models (IAMs) that limit global warming to <2°C or less above preindustrial levels (Collins et al., 2013; Rockström et al., 2016; Rogelj et al., 2016). However, none of the currently debated negative emissions technologies, such as bioenergy with carbon capture and storage (BECCS), direct air capture with carbon storage (DACCS) and enhanced weathering  
50 (EW), appears to have, regardless of the scenario, the potential to meet the <2°C target without significant impacts on land, energy, water or nutrient resources (Fuss et al., 2014; Smith et al., 2016; Williamson, 2016; Boysen et al., 2017).

One other option that has been considered is ocean carbon sequestration by direct injection of CO<sub>2</sub> into the deep ocean (e.g., Marchetti, 1977; Hoffert et al., 1979; Orr et al., 2001; Orr, 2004; IPCC, 2005; Reith et al., 2016). The CO<sub>2</sub> could be derived from point sources such as power plants or direct air capture facilities, and thereby contribute to the carbon se-

55 questration part of CCS, DACCS or BECCS. Direct injection of CO<sub>2</sub> into the deep ocean can also be thought of as the deliberate acceleration of the oceanic uptake of atmospheric CO<sub>2</sub>, which happens naturally via invasion and dissolution of CO<sub>2</sub> into the surface waters, albeit at a relatively slow rate limited by the sluggish ocean overturning circulation. On millennial timescales, about 65-80% of anthropogenic CO<sub>2</sub> is thought to be taken up by the ocean via gas exchange at the ocean surface and by entrainment of surface waters into the deep ocean. This portion rises to 73-93% on timescales of tens to hundreds of  
60 millennia via neutralization of carbonic acid with sedimentary calcium carbonate (CaCO<sub>3</sub>) (e.g., Archer et al., 2005; Zeebe, 2012). Directly injecting CO<sub>2</sub> into the deep ocean could speed up this natural process by directly accessing deep waters, some of which remain isolated from the atmosphere for hundreds or thousands of years (DeVries and Primeau, 2011; their Figure 12), and by bringing the anthropogenic CO<sub>2</sub> in closer contact with the sediment where carbonate compensation reactions occur. This would prevent anthropogenic CO<sub>2</sub> from having an effect on the climate in the near future, and accelerate eventual  
65 and nearly permanent removal via reaction with CaCO<sub>3</sub> sediments.

Despite the well-known potential of the ocean to take up and store carbon (e.g., Sarmiento and Toggweiler, 1984; Volk and Hoffert, 1985; Sabine et al., 2004;), direct CO<sub>2</sub> injection into the deep ocean is currently not allowed by the London Protocol and the Convention for the Protection of the Marine Environment of the North East Atlantic (OSPAR Convention) (Leung et al., 2014). A main concern that led to the current ban is that direct CO<sub>2</sub> injection will harm marine ecosystems in  
70 the deep sea, e.g., cold-water corals and sponge communities, at least close to the injection site (e.g., IPCC, 2005; Schubert et al., 2006; Gehlen et al., 2014). As emphasized by Keeling (2009) and Ridgwell et al. (2011) there are, however, trade-offs between injection-related damages in the deep ocean and benefits at the ocean surface via a reduction in atmospheric pCO<sub>2</sub> and a decrease in upper ocean acidification. These should be discussed in relation to other mitigation options, that probably all imply offsetting some local harm against global benefits. Our current study aims to inform such a debate by providing  
75 quantitative information about impacts on ocean carbonate chemistry caused by direct injection of CO<sub>2</sub> into the deep ocean as a potential measure to reach and maintain a specific temperature target as given by the Paris climate targets.

For this purpose, we consider direct injection of CO<sub>2</sub> into the deep ocean as ‘oceanic CCS’, depositing CO<sub>2</sub> from point sources such as fossil fuel or biomass-based power plants or direct air capture plants. We assume that aggressive emissions reduction has led from a business-as-usual CO<sub>2</sub> emission scenario to a world with intermediate CO<sub>2</sub> emissions such as  
80 the one represented by the Representative Concentration Pathway (RCP) 4.5. Model-predicted global mean surface air temperatures for the RCP 4.5 CO<sub>2</sub> emission scenario range between 1.7°C and 3.2°C in the year 2100 (Clarke et al., 2014), which is approximately in agreement with the warming after full achievement of current NDCs. Consequently, the 1.5°C climate target would not be reached under the RCP 4.5 scenario and is likely to be exceeded after the year 2050 (IPCC, 2014). We here explore the potential as well as collateral oceanic effects of ‘oceanic CCS’ as a means to fill the gap between emissions

85 and climate impacts of the RCP 4.5 and the 1.5°C target of the Paris agreement. Note that we neglect the effects of non-CO<sub>2</sub> forcing agents as well as any additional costs and trade-off in terms of CO<sub>2</sub> emissions caused by the carbon capture and injections (e.g., through implementation of required infrastructure for deploying oceanic CCS). Consequently, our results provide a lower limit estimate, i.e. the cumulative CO<sub>2</sub> amount that would need to be at least injected into the deep ocean in order to comply with the desired target. The paper is organized as follows: In section 2 we address the methodological framework by describing the UVic model and the experimental setup of our experiments. In section 3 the results and the discussion of our model simulations are presented. Section 4 outlines the conclusions.

## 2. Methods

### 2.1 Model description

The model used is version 2.9 of the University of Victoria Earth System Climate Model (UVic ESCM). It consists of three dynamically coupled main components: a three-dimensional general circulation ocean model based on the Modular Ocean Model MOM2 (Pacanowski, 1996) including a marine biogeochemical model (Keller et al., 2012), a dynamic-thermodynamic sea-ice model (Bitz and Lipscomb, 1999) and a CaCO<sub>3</sub>-sediment model (Archer, 1996). The UVic ESCM further includes a terrestrial vegetation and carbon-cycle model (Meissner et al., 2003) based on the Hadley Center model TRIFFID (Top-down Representation of Interactive Foliage and Flora Including Dynamics) and the hydrological land component MOSES (Met Office Surface Exchange Scheme), and a one-layer atmospheric energy-moisture balance model (based on Fanning and Weaver, 1996). All components have a common horizontal resolution of 3.6° longitude x 1.8° latitude. The oceanic component has 19 vertical levels with thicknesses ranging from 50 m near the surface to 500 m in the deep ocean. Formulations of the air-sea gas exchange and seawater carbonate chemistry are based on the OCMIP abiotic protocol (Orr et al., 1999). Marine sediment processes of CaCO<sub>3</sub> burial and dissolution are simulated using a model of deep ocean sediment respiration (Archer, 1996).

### 2.2 Experimental design

For our default control run and injection experiments, the model has been spun up for 10,000 years under preindustrial atmospheric and astronomic boundary conditions and run from 1765 to 2005 using historical fossil-fuel and land-use carbon emissions (Keller et al., 2014). From the year 2006 onwards simulations are forced with CO<sub>2</sub> emissions according to the RCP 4.5 and the Extended Concentration Pathway (ECP) 4.5, which runs until the year 2500 (Meinshausen et al., 2011). This forcing includes CO<sub>2</sub>-emissions from fossil fuel burning as well as land-use carbon emissions, e.g. from deforestation. After the year 2500, CO<sub>2</sub> emissions are assumed to decrease linearly until they cease at the end of the simulations in year

3020. In the default control run and injection experiments we do not apply greenhouse gas emissions other than CO<sub>2</sub>, nor do we simulate the effect of sulfate aerosols or non-CO<sub>2</sub> effects of land use change. Further, prescribed monthly varying winds from the National Center for Environmental Prediction (NCEP) reanalysis are used together with a dynamical feedback from a first-order approximation of geostrophic wind anomalies associated with changing winds in a changing climate (Weaver et al., 2001).

Simulated CO<sub>2</sub> injections are based on the OCMIP carbon sequestration protocols (see Orr et al., 2001; Orr, 2004) and carried out in an idealized manner by adding CO<sub>2</sub> directly to the dissolved inorganic carbon (DIC) pool, thus neglecting any gravitational effects and assuming that the injected CO<sub>2</sub> instantaneously dissolves into seawater and is transported quickly away from the injection point and distributed homogeneously over the entire model grid box with lateral dimensions of a few hundred kilometers and many tens of meters in the vertical direction (Reith et al., 2016). Consequently, the formation of CO<sub>2</sub> plumes or lakes as well as the potential risk of fast rising CO<sub>2</sub> bubbles are neglected (IPCC, 2005; Bigalke et al., 2008).

The physical transport of the injected CO<sub>2</sub> and its transport pathways from the individual injection sites towards the surface of the ocean are tracked by means of inert ‘dye’ tracers (one per injection site). At the injection sites, these tracers are loaded at rates proportional to the amount of CO<sub>2</sub> injected. At the sea surface the tracers are subject to a loss to the atmosphere, which is computed in proportionality to the total CO<sub>2</sub> gas exchange and fractional contribution to total DIC of the respective tracer at the ocean surface. The sum of tracer loss to the atmosphere from the individual ‘dye’ tracers provides an estimate of the loss of injected carbon to the atmosphere.

Following Orr et al. (2001), Orr (2004) and Reith et al. (2016) CO<sub>2</sub> is injected at seven separate injection sites, which are defined as individual grid boxes near the Bay of Biscay (42.3°N, 16.2°W), New York (36.9°N, 66.6°W), Rio de Janeiro (27.9°S, 37.8°W), San Francisco (31.5°N, 131.4°W), Tokyo (33.3°N, 142.2°E), Jakarta (11.7°S, 102.6°E) and Mumbai (13.5°N, 63°E) (Reith et al., 2016; their Figure 1). Injected CO<sub>2</sub> is distributed equally among the seven injection sites. Direct CO<sub>2</sub> injections are carried out in the vertical grid box ranging from 2580 to 2990 m water depth (hereafter referred to as injection at 3000 m). Compared to shallower injection, this reduces leakage and increases retention time (e.g., Orr et al., 2001; Orr, 2004; Jain and Cao, 2005; Ridgwell et al., 2011; Reith et al., 2016). At this depth, liquid CO<sub>2</sub> is denser than seawater, which has the additional advantage that any undissolved droplets would sink to the bottom rather than rise to the surface.

### 2.3 Model experiments

Three conceptually different approaches for applying oceanic CCS are simulated using the UVic model: The first approach (*A1*) assumes that all anthropogenic CO<sub>2</sub> emissions are injected after a warming of 1.5°C is realized for the first

time, the second approach (*A2*) injects, in every year, an amount of CO<sub>2</sub> that ensures that temperatures do not rise beyond the 1.5°C target, and the third approach (*A3*) injects an amount of CO<sub>2</sub> to ensure that atmospheric CO<sub>2</sub> concentrations follow the RCP/ECP 2.6 scenario as closely as possible. All idealized approaches are designed to counter the excessive emissions of the RCP 4.5 scenario by direct CO<sub>2</sub> injections into the deep ocean to reach and maintain a specific temperature target as given by the 1.5°C target until the end of this century and for another millennium. Injections in *A2* (*A3*) are interrupted when the simulated annual mean surface air temperature (atmospheric pCO<sub>2</sub>) falls below the respective climate target. We further study how the simulation of CaCO<sub>3</sub> sediment feedbacks and associated continental weathering modifies required CO<sub>2</sub>-injections and its impacts on ocean biogeochemistry. Table 1 provides an overview of all conducted simulations and their set-up from the year 2006 onwards.

In the first approach (*A1*), all further CO<sub>2</sub> emissions of the RCP 4.5 scenario are completely re-directed to the injection sites after the global-mean surface air temperature has for the first time exceeded the 1.5°C target. Some committed warming (e.g., Matthews and Caldeira, 2008; Gillet et al., 2011) occurs in these simulations due to past emissions and climate cycle feedbacks. This committed warming is at some point overlaid by leakage of injected CO<sub>2</sub> out of the ocean (e.g., Orr, 2004; Reith et al., 2016), as well as by oceanic and terrestrial carbon cycle feedbacks that lead to a CO<sub>2</sub> increase in the atmosphere and respective additional warming (see section 3.1). To diagnose the contribution from leakage, we design a leakage-free sensitivity simulation (*A1\_Comitw*), in which CO<sub>2</sub> emissions are set to zero once the 1.5°C target is reached, and no CO<sub>2</sub> is injected into the deep ocean.

In contrast to the first approach, the second one (*A2*) keeps the global mean temperature at the defined threshold of 1.5°C, relative to preindustrial, by injecting as much CO<sub>2</sub> into the deep ocean as is necessary to maintain an annual mean temperature that is only 1.5°C above preindustrial levels. We diagnose this amount of CO<sub>2</sub> using the transient response to emissions (TCRE, Allen et al., 2009; Matthews et al., 2009; MacDougall, 2016) of our model and the difference of the modeled annual mean atmospheric temperature and the target temperature. CO<sub>2</sub> is only injected if the modeled temperature is above the target temperature. In order to avoid interference with seasonal and longer periodic fluctuations of atmospheric temperature (sensitivity experiments, not shown) we apply a running-mean averaging time scale of 1000 days. CO<sub>2</sub> injection rates required to reach the respective target are updated every 5 days, which is when the atmospheric and oceanic model components are coupled. The rate of CO<sub>2</sub> injection taken out of the atmosphere can be larger than the actual CO<sub>2</sub>-emissions (RCP/ECP 4.5), i.e. constitute net negative CO<sub>2</sub> emissions.

In the third approach (*A3*), we inject the amount of CO<sub>2</sub> that is needed to follow the atmospheric CO<sub>2</sub> concentrations of the extended Representative Concentration Pathway RCP 2.6 and Extended Concentration Pathway ECP 2.6, which is a reference scenario that has been suggested to reach the <2°C climate target with a ≥66% probability (IPCC, 2014). From year



2500 onwards, the targeted atmospheric CO<sub>2</sub> concentration is held constant until the end of the simulations. Therefore, the model computes at every atmospheric time step the difference between its current simulated atmospheric CO<sub>2</sub> concentration, given the RCP 4.5 CO<sub>2</sub>-emissions, and the targeted atmospheric CO<sub>2</sub> concentration from the RCP 2.6 pathway. This difference is used to diagnose the CO<sub>2</sub>-injection needed to keep the model's atmospheric CO<sub>2</sub> concentrations as close as possible to the RCP 2.6 concentration pathway. A respective amount of CO<sub>2</sub> is injected and subtracted from the prescribed CO<sub>2</sub> emissions to the atmosphere, which eventually results in net negative emissions. We apply temporal averaging and update the required CO<sub>2</sub>-injection every 5 days.

In sensitivity experiments (Table 1) we further investigate the effect of CaCO<sub>3</sub> sediment feedbacks and continental weathering on the cumulative CO<sub>2</sub> injections and on seawater carbonate chemistry for the different approaches. The effect of CaCO<sub>3</sub> sediment dissolution is thought to be relevant as CO<sub>2</sub> injected at depth may react relatively directly with sedimentary CaCO<sub>3</sub> and increase CaCO<sub>3</sub> dissolution near or downstream of the injection sites, resulting in an accelerated neutralization of this anthropogenic CO<sub>2</sub> compared to a situation where CO<sub>2</sub> slowly invades the ocean via air-sea gas exchange (Archer et al., 1998; IPCC, 2005). Therefore, we investigate the effect of CaCO<sub>3</sub> sediment feedbacks in our simulations by running the model with and without a sediment sub-model. The global average percent of CaCO<sub>3</sub> in sediments in our "sed" simulations (section 3.2) is about 31 % in the year 2020 and compares well to about 34.5 % derived from observations as reported in Eby et al. (2009). To ensure that, in steady state (i.e., during the model spin-up), DIC and alkalinity are conserved, the UVic model with sediment module also has a simple representation of continental weathering to compensate the burial-related loss of DIC and alkalinity. From the model spin-up we diagnose the global terrestrial weathering flux of DIC as 0.12 Gt C yr<sup>-1</sup>, and an alkalinity flux of 0.02 Pmol yr<sup>-1</sup>. During the transient runs with sediment module, this weathering flux is held constant, whereas sedimentary CaCO<sub>3</sub> accumulation or dissolution is allowed to evolve freely. Consequently, ocean alkalinity and DIC adjust in response to interactions between seawater, injected CO<sub>2</sub>, and sediments. Simulations with the sediment/weathering sub-model are based on a separate set of spin-up experiments (50 000 years), drift runs and historical simulation that all employ the sediment/weathering sub-model. Hereafter, simulations performed with the sediment/weathering model are referred to by the subscript "sed" (Table 1).

Relevant carbonate system parameters that are not computed at model run-time are derived offline for all simulations by means of the Matlab-version of CO<sub>2</sub>SYS (Lewis and Wallace, 1998; van Heuven et al., 2009; Koeve and Oschlies, 2012; currently available from <http://cdiac.ess-dive.lbl.gov/ftp/co2sys>), using carbonic acid dissociation constants of Mehrbach et al. (1973), as refitted by Dickson and Millero (1987), and other related thermodynamic constants (Millero, 1995).

### 3. Results and Discussion

#### 3.1 Oceanic CCS and the 1.5°C climate target

Here, we present the cumulative mass of CO<sub>2</sub> injected in the default runs (without CaCO<sub>3</sub> sediments) of the different approaches and show how effective these are in reaching and maintaining the 1.5°C climate target.

In the default simulation of the first approach (*AI*) oceanic CCS starts in the year 2045 after the 1.5°C climate target has been exceeded for the first time at a corresponding atmospheric CO<sub>2</sub> concentration of about 466 ppmv (Figs. 1 a, b, c). Between years 2020 and 2045, about 278 Gt C have been emitted in form of CO<sub>2</sub> to the atmosphere, i.e. a small fraction of the 1242 Gt C of total emissions corresponding the extended RCP 4.5 scenario between years 2020 and 3020. From 2045 until year 3020, all CO<sub>2</sub> emissions (964 Gt C in total) are directly injected into the deep ocean (Fig. 1 a), resulting in zero anthropogenic CO<sub>2</sub> emissions into the atmosphere for the remaining simulation. After injection starts in year 2045, the atmospheric CO<sub>2</sub> concentration decreases, but only until the year 2341, when a minimum of about 409 ppmv is reached (Fig. 1 c). The increase of atmospheric CO<sub>2</sub> from year 2342 onwards is a result of leakage of CO<sub>2</sub> injected into the deep ocean earlier. By the end of the simulation, a total amount of 437 Gt C has leaked back into the atmosphere (Fig. 1 d). Thus, only about 55 % of the total mass injected (964 Gt C) remains in the ocean until year 3020. From 2078 onwards, the land perennially turns into a carbon source with a total carbon loss of about 21 Gt C to the atmosphere.

Global mean temperature, relative to preindustrial, oscillates around the 1.5°C climate target within  $\pm 0.02^\circ\text{C}$  after injections started until the year 2200. Until then, this approach (*AI*) is thus nearly successful in reaching and maintaining the 1.5°C climate target. Subsequently, however, global mean surface air temperature shows a slow increase of up to 0.02°C until 2341 although atmospheric CO<sub>2</sub> still decreases. This warming signal is owed to the lagged response of the deep ocean to previously increasing atmospheric CO<sub>2</sub>, i.e. committed warming, resulting in a decline of the ocean heat uptake from the atmosphere and thus in an increase in the global mean temperature (Zickfeldt and Herrington, 2015; Zickfeldt et al., 2016). In this simulation (*AI*), this feedback mechanism (see also Fig. S1) is overlaid by increasing leakage of injected CO<sub>2</sub> back into the atmosphere, which becomes the dominating process for atmospheric warming as obvious from the atmospheric CO<sub>2</sub> increase after year 2342 (Figs. 1 c, d). Hence, the global mean air temperature shows a steeper increase until it reaches a maximum of about +2.2°C above preindustrial level at the end of the simulation (Fig. 1 b). Thus, on a millennial time scale, the *AI* simulation overshoots the 1.5°C climate target by about 0.7°C. By subtracting this diagnosed leakage of 437 Gt C from the cumulative CO<sub>2</sub> injections (964 Gt C), we determine the required CO<sub>2</sub> emission reduction (527 Gt C) (Fig. 1 e) relative to the RCP/ECP 4.5 scenario to comply with a global mean temperature of about +2.2°C, relative to preindustrial, on a thousand-year timescale.

Oceanic CCS in the second approach (*A2*) starts as well in 2045 (Figs. 1 a, c). Global mean temperature oscillates around the 1.5°C climate target until year 2300 (Fig. 1 b). These oscillations get smaller over time until global mean temperature essentially stays at 1.5°C until the end of the simulation. We find that the oscillations arise in the applied model from climate-sea-ice feedbacks under the near-term 1.5°C conditions (see Fig. S2). The terrestrial biosphere turns into a carbon source in 2061 and land-atmosphere carbon fluxes oscillate around zero until the end of the simulation. The total carbon loss from land to the atmosphere is about 75 Gt C. Atmospheric CO<sub>2</sub> concentrations show a continuous decline when global mean temperature is held at the aspired climate target (Figs. 1 b, c). This is caused by a decline in ocean heat uptake as mentioned above and consistent to an additional accumulation of heat in the atmosphere at constant atmospheric CO<sub>2</sub> concentrations (e.g., Zickfeldt and Herrington, 2015; Zickfeldt et al., 2016), and which, in our second approach, needs to be counteracted by further CO<sub>2</sub> injections into the deep ocean.

By the end of the *A2* run, cumulative CO<sub>2</sub> injections amount to about 1562 Gt C, which is about 600 Gt C (62 %) higher than in the *A1* simulation. This amount of additional CO<sub>2</sub>-injections is needed in order to reduce global mean warming at the end of the thousand-year simulation from 2.2°C in run *A1* to 1.5°C in run *A2*. In the *A2* run, the diagnosed mass of injected CO<sub>2</sub> that has leaked into the atmosphere and has been reinjected into the deep ocean during the entire simulation adds up to about 607 Gt C until year 3020 (Fig. 1 d). Hence, about 61 % of the total mass injected (1562 Gt C) stays in the ocean. This results in a required CO<sub>2</sub> emission reduction of about 955 Gt C (Fig. 1 e), i.e., the amount of emission reduction necessary to comply with the 1.5°C climate target on a 1000-year timescale.

In the third approach, *A3*, oceanic CCS starts in year 2031 (Fig. 1 a) as the atmospheric CO<sub>2</sub> concentration caused by the RCP 4.5 CO<sub>2</sub> emission scenario starts to exceed the targeted RCP 2.6 atmospheric CO<sub>2</sub> concentration. Relative to preindustrial, global mean temperature continues to increase to a maximum of approximately +1.5°C in the year 2078 at a corresponding atmospheric CO<sub>2</sub> concentration of 433 ppmv (Figs. 1 b, c). Subsequently, temperature decreases until it reaches about +0.9 °C relative to preindustrial temperature, while the atmospheric CO<sub>2</sub> concentration reaches 327 ppmv at the end of the simulation (Figs. 1 b, c). Up to that point in time, cumulative CO<sub>2</sub> injections in the *A3* simulation amount to about 2200 Gt C (Fig. 1 a). In response to negative emissions the land turns into an atmospheric carbon source (Keller et al., 2018) between year 2076 and 2600 with a total loss of about 144 Gt C to the atmosphere. From year 2600 onwards, the carbon flux between the atmosphere and land is nearly zero (below 0.03 Gt C/yr<sup>-1</sup>). By the end of the simulation, the diagnosed leakage of injected carbon adds up to about 900 Gt C (Fig. 1 d), which means that about 59 % of the injected CO<sub>2</sub> that remains in the ocean until year 3020. The required emission reduction to move from an RCP4.5 pathway to RCP 2.6 in the *A3* run is about 1300 Gt C (Fig. 1 e).

260 By the end of the *A3* simulation, cumulative CO<sub>2</sub> injections are about 636 Gt C (29 %) higher than in the *A2* simula-  
tion. This is also reflected in the higher diagnosed leakage by about 293 Gt C in total, when compared to the *A2* simulation.  
In the attempt to follow the atmospheric CO<sub>2</sub> concentration of the RCP2.6 (section 2.3), cumulative CO<sub>2</sub> injections are almost  
twice the amount of the cumulative CO<sub>2</sub> emissions difference between the RCP4.5 scenario and the RCP2.6 scenario applied  
here. This can be explained by the fact that deep oceanic CCS steepens the surface to deep DIC-gradient (Fig. S3 a) fostering  
265 a back transport to the surface ocean. Most of this enhanced deep water DIC is transported with the meridional overturning  
circulation to the Southern Ocean (south of 40°S), where the largest fraction of the total leakage occurs in our injection exper-  
iments (Fig. S3 b). By the end of the *A1* simulation, we find that about 60 % of the diagnosed leakage has outgassed in the  
Southern Ocean compared to about 77 % in *A2* run and about 80 % in the *A3* simulation. Overall, we find that, the higher the  
direct CO<sub>2</sub> injections into the deep ocean are, the higher the leakage (Figs. 1 a, d) and the higher the relative portion out-  
270 gassed in the Southern Ocean.

What this means in terms of the effectiveness of oceanic CCS is further highlighted by the comparison of the re-  
quired cumulative CO<sub>2</sub> injections of the three different approaches (*A1*, *A2*, and *A3*) and the respective required emission re-  
ductions needed to reach the run's specific climate target under a RCP/ECP 4.5 CO<sub>2</sub> emission scenario. As illustrated in Figs.  
2 a, b, c, the approaches *A1*, *A2* and *A3* represent increasingly stringent climate targets as evident from decreasing atmospher-  
275 ic warming relative to preindustrial conditions. Cumulative CO<sub>2</sub> injections by the year 2100 are largely equivalent to the re-  
quired emission reduction, because only a tiny fraction of injected CO<sub>2</sub> has outgassed until that point in time (Figs. 1 d, 2 a).  
However, by the end of the millennial injection experiments, cumulative CO<sub>2</sub> injections are much larger than the required  
emission reductions in year 3020 as indicated by the slopes of the eye-fitted lines in Figs. 2 b, c. This is due to the fact that  
the leakage in the injection experiments (Fig. 1 d) requires a larger CO<sub>2</sub> removal effort, i.e., CO<sub>2</sub> that leaks out has to be  
280 reinjected. If there were no leakage of injected carbon, i.e., perfect storage, then the cumulative CO<sub>2</sub> injections would equal  
the required emission reductions.

### 3.1.2 Land response

Biological processes primarily control the exchange of atmospheric CO<sub>2</sub> with the land, where the majority of the carbon is  
stored in soils and permafrost. CO<sub>2</sub> is removed from the atmosphere by plant photosynthesis and primarily returned to the  
285 atmosphere by respiration and other processes such as fire (Cias et al., 2013). As long as primary production (GPP; i.e. gross  
photosynthetic carbon fixation) is greater than carbon losses due to respiration and processes such as fire, the land will be a  
carbon sink (Le Quere et al., 2016). If this balance changes then the land can become a source of CO<sub>2</sub> to the atmosphere. In  
our simulations as emissions increase and decrease (with oceanic CCS), eventually reaching net negative- and/or zero- emis-

sion, the terrestrial carbon cycle is perturbed and can switch from a sink to a source. The magnitude of the land carbon cycle response due to an injection-related atmospheric carbon reduction, and eventual increase as in the *A1 experiment*, (see Section 3.1) is mainly governed by the reduced CO<sub>2</sub> fertilization effect on net primary productivity and the temperature related change in heterotrophic soil respiration, responses that have been investigated in Reith et al., 2016. In all simulations the land changes from a carbon sink to source, eventually reaching almost a balance (almost zero net flux) in the *A2* and *A3* simulations. In the *A1* simulation, the increase in atmospheric CO<sub>2</sub> after a period of decline (Fig. 1 c) is not able to overcome the temperature effect that elevates respiration rates and the land continues to perennially lose carbon.

### 3.2 Sensitivities to CaCO<sub>3</sub> sediment feedbacks and weathering fluxes

As illustrated in Fig. 2 b, cumulative CO<sub>2</sub> injections in the *A2<sub>sed</sub>* simulation are about 165 Gt C (11 %) smaller until the year 3020 when compared to the *A2* run (1562 Gt C). This smaller CO<sub>2</sub> injection is a result of two processes (CaCO<sub>3</sub> sediment dissolution and constant terrestrial weathering), which both have the net effect of adding alkalinity to the model ocean, when compared to the standard experiments without sediment feedbacks and continuous weathering fluxes. By the end of the simulation, average ocean alkalinity has increased by 32 mmol/m<sup>3</sup> in the *A2<sub>sed</sub>* run compared to an average value of 2422 mmol/m<sup>3</sup> in the *A2* run. About 84 % of this increase in global mean alkalinity can be attributed to ocean CCS and resulting sediment dissolution at depth, the rest is from ocean acidification-induced CaCO<sub>3</sub> dissolution according to the RCP 4.5 CO<sub>2</sub>-emission scenario, as evident from the control run with sediment and weathering feedback. An increase in ocean alkalinity may enhance the oceanic uptake of atmospheric CO<sub>2</sub>, however, only if waters with increased alkalinity arrive at the surface waters and lower surface-ocean pCO<sub>2</sub>. This, in turn, reduces the required CO<sub>2</sub> injections to reach and maintain the 1.5°C climate target. Dissolution of CaCO<sub>3</sub> deep-sea sediments caused by the injection of CO<sub>2</sub> into the deep ocean at 3000m causes the dissolution of 11.8 Pmol CaCO<sub>3</sub> in the *A2<sub>sed</sub>* simulation by year 3020 releasing 11.8 Pmol DIC and 23.6 Pmol alkalinity to the deep ocean. Highest CaCO<sub>3</sub> dissolution rates occur in the vicinity of the seven injection sites (Figs. S4 a, b). Hence, ocean acidification reaching the deep ocean and ocean CCS convert sediments from a CaCO<sub>3</sub> sink (116 Gt CaCO<sub>3</sub>-C at the end of the respective spin-up run) to a source of its dissolution products. A second process that contributes to the increase in ocean alkalinity is the terrestrial CaCO<sub>3</sub> weathering flux which arrives in the surface ocean via river discharge, and amounts to about 19.3 Pmol alkalinity and 9.7 Pmol C (116 Gt C) by the end of the *A2<sub>sed</sub>* simulation.

Disentangling the relative role of the two processes (turning CaCO<sub>3</sub> burial into CaCO<sub>3</sub> dissolution; continuous flux of alkalinity from terrestrial weathering) with respect to stabilizing oceanic CO<sub>2</sub> uptake and thereby affecting the required CO<sub>2</sub> injections is not trivial. Waters affected by CaCO<sub>3</sub> sediment dissolution in the deep ocean need to return to the ocean surface before having an effect on surface ocean pCO<sub>2</sub> and oceanic CO<sub>2</sub> uptake (Cao et al., 2009). The fluxes from terrestrial

weathering, however, are in our simulation, continuous and constant with time (no sensitivity of weathering to changes in atmospheric  $p\text{CO}_2$ , surface air temperature, precipitation, or terrestrial production), and directly arrive in the surface ocean via river inflow. It is thus likely that, in comparison to the standard experiments without terrestrial weathering, the latter affects the atmosphere-ocean  $\text{CO}_2$ -flux well before the alkalinity input related to  $\text{CaCO}_3$  dissolution. Quantifying the effect of each process to reduce the required  $\text{CO}_2$  injection individually, however, would require additional simulations, e.g. experiments with  $\text{CaCO}_3$  dissolution turned on but terrestrial weathering turned off. This is beyond the scope of this study. In consequence, of the two processes mentioned above, the required emission reduction amounts to about 846 Gt C, i.e.  $\sim 109$  Gt C (11 %) less when compared to the *A2* run (Fig. 2 b).

The net effects of sediment/weathering feedbacks on the required  $\text{CO}_2$  injections in simulations of the second approach described above are as well represented in the injection experiments of the first and third approach, but are of smaller magnitude, i.e., 5 % less (Fig. 2 a, b, c).

### 3.3 Biogeochemical impacts

Here, we present injection related biogeochemical impacts with respect to changes in pH and the saturation state of aragonite in the default simulations of the second (*A2*) and third approach (*A3*) and of the respective RCP 4.5 control run. Simulations of the first approach are neglected here, because this one cannot reach and maintain the  $1.5^\circ\text{C}$  climate target.

At the beginning of our default simulations (year 2020), the uptake of anthropogenic  $\text{CO}_2$  has lowered average pH at the ocean surface by about 0.12 units, relative to its preindustrial value of about 8.16 (Fig. 3 a). This trend continues in the control simulation until its maximum reduction of about -0.25 units in the year 2762, which stays nearly constant until the end of the simulation (Fig. 3 a).

As direct  $\text{CO}_2$  injections lead to a decline in the atmospheric  $\text{CO}_2$  concentration (Fig. 1 c) and, in consequence, to a lower upper-ocean carbon uptake via air-sea gas exchange, we find smaller reductions in average ocean surface pH, i.e. reduced upper ocean acidification, after year 2045 in the *A2* simulation and after year 2031 in the *A3* run (Fig. 3 a), i.e., shortly after their respective starting points of oceanic CCS (Fig. 1 a). In year 3020 the average ocean surface pH in the *A2* simulation is about +0.13 units higher, when compared to the control run (Fig. 3 a). Using global mean surface ocean pH as a metric, surface ocean acidification in year 3020 compared to year 2020 is slightly more intense in the *A2* simulation, but even more reduced in the *A3* run. In both cases this is a direct effect of a lower atmospheric  $p\text{CO}_2$  (Fig. 1 c) compared to year 2020. Amelioration of surface ocean pH shows regional variability (Fig. 3 b), with local maxima of the pH difference between the *A2* simulation and the control run in the year 3020 up to +0.23 units, in particular in northern latitudes (Fig. 3 b).

However, surface ocean acidification is less reduced in the Southern Ocean and even slightly higher in parts of the Weddell Sea, where most of the injected CO<sub>2</sub> leaks back into the atmosphere (Fig. 3 b).

The simulated ameliorations in the surface ocean pH come at the expense of strongly acidified water masses in the vicinity of the seven injection sites at 3000m depth, when compared to the RCP 4.5 control run. In order to assess how much of the global ocean volume ( $\sim 1.6 \times 10^9 \text{ km}^3$ ) shifts to biotically critical pH values in our simulations, we define two pH categories. The first category is defined as  $7.4 \leq \text{pH} \leq 7.8$  (solid lines in Fig. 3 c) and is chosen because studies have shown that all calcifiers such as coralline algae and foraminiferans are strongly reduced or are absent from acidified areas ( $\text{pH} < 7.8$ ) and the overall biomass of the benthic community is about 30 % less compared to normal conditions (e.g., IPCC, 2011; Fabricius et al., 2015). The second category includes pH values that are lower than 7.4 (dashed lines in Fig. 3 c). Such low pH values are for instance found in the vicinity of volcanic CO<sub>2</sub> vents and cause a massive drop in biodiversity (e.g., Ogden, 2013).

In our control simulation, we find a steady increase in the ocean volume characterized by  $7.4 \leq \text{pH} \leq 7.8$ , from about 11 % of total ocean volume in year 2020 to about 63 % in year 3020 (Fig. 3 c). Oceanic CCS in the *A2* and *A3* simulation leads to a much steeper increase of ‘moderately’ acidified waters ( $7.4 \leq \text{pH} \leq 7.8$ ) with maximum values of 76 % and 71 %, respectively, in year 2551 (Fig. 3 c), but decreasing to 72 % and 64 % in year 3020. Considering our chosen category ( $7.4 \leq \text{pH} \leq 7.8$ ) ocean CCS mainly speeds up interior-ocean acidification but does not increase the acidified volume at the end of the simulation very much. At the end of the simulation the *A3* simulation and the *A2* run show an increase of affected interior-ocean water by 1 and 13 %, respectively, compared to the control run.

Respective volumes of the second category ( $\text{pH} < 7.4$ ) start to appear around the year 2400 in the control simulation and then slowly increase to about 2 % until the end of the simulation (Fig. 3 e). In contrast, oceanic CCS directly results in the immediate appearance of waters with  $\text{pH} < 7.4$ , with a volume steadily increasing until the year 3020 where it reaches 9 % of total ocean volume in the *A2* simulation and 15 % in the *A3* run (Fig 3 c). The differences in both pH categories between the injection experiments are due to the higher cumulative mass of injected CO<sub>2</sub> in the *A3* run, leading to a smaller volume in the first category and to a bigger volume in the second one (Figs. 1 a, 2 b).

In order to further identify extreme pH related to the injections, we look at minimum pH values. These are found at 3000m depth, i.e., the depth at which oceanic CCS is carried out. Relative to preindustrial conditions, the highest reductions in pH minima are found in the *A2* simulation with about -2.37 units in year 2062, however with large regional variability (Fig. 3 d, e). Subsequently, the pH minima in the *A2* simulation show strong oscillations until about the year 2400, which are caused by the different annual CO<sub>2</sub> injection rates. By the end of the *A2* simulation, minimum pH values at 3000m depth are up to 1 unit lower than in the control run (Fig. 3 d). We find a similar pattern in the *A3* simulation, although the pH reductions show only slight oscillations, resulting in a more constant pH reduction than in the *A2* simulation (Fig. 3 d). In comparison to the injection



tion experiments, minimum pH values in the control run start to appear from the year 2300 onwards, leading to a reduction by about -0.17 units in the year 3020 (Fig. 3 d), i.e. the deep ocean feels ocean acidification very slowly.

To summarize we observe an increasing benefit in reduced acidification at the ocean surface with higher cumulative CO<sub>2</sub> injections, which comes at the expense of increasing acidified water masses in the intermediate and deep ocean with strongest pH reductions in the vicinity of the injection sites (Fig. 3 e). Figure 4 a, b illustrates this trade-off for the injection experiments of the *A2* and *A3* simulations as well as for the respective control runs in year 3020. By comparing the different simulations with each other, we find that continental weathering and CaCO<sub>3</sub> sediment feedbacks lead to a slightly higher increase in average pH at the ocean surface as well as smaller minimum pH values at 3000m depth, when compared to preindustrial. This is caused by the dissolution of CaCO<sub>3</sub> sediments and the terrestrial weathering flux, which both have the net effect of adding alkalinity to the ocean and thereby increasing the buffer capacity of seawater.

The reported reductions in global average surface pH in our control simulation caused by the partial oceanic uptake of the RCP 4.5 CO<sub>2</sub> emissions correspond to an increase in hydrogen ions (H<sup>+</sup>), which partly react with carbonate ions (CO<sub>3</sub><sup>2-</sup>) to form bicarbonate ions (HCO<sub>3</sub><sup>-</sup>). This leads in consequence to a reduction in the surface saturation state ( $\Omega$ ) with respect to the CaCO<sub>3</sub> minerals aragonite and calcite. This is of importance to marine calcifiers, because the formation of shells and skeletons generally occurs where  $\Omega > 1$  and dissolution occurs where  $\Omega < 1$  (unless the shells or skeletons are protected, for instance, by organic coatings) (Doney et al., 2009; Guinotte and Fabry, 2008). Since aragonite is about 1.5 times more soluble than calcite (Mucci, 1983) and since aragonite is the mineral form of coral reefs, which are of large socio-economic value, we only report here on simulated changes in the saturation state of aragonite.

To investigate how tropical coral reef habitats might be impacted in our simulations, we here define the potential coral reef habitat as the volume of the global upper ocean (0:130 m, the two topmost model grid cells), which is characterized by  $\Omega_{AR} > 3.4$  and ocean temperatures between 21°C and 28°C, where most coral reefs exist (Kleypas et al., 1999). We present this volume as the percent fraction of the total upper ocean volume ( $4.637 \times 10^7 \text{ km}^3$ ) in our model.

For preindustrial conditions (year 1765), we find that about 37 % of the upper ocean volume is within our defined thresholds (green star in Figs. 5 a, b). At the beginning of our simulations (year 2020), this coral reef habitat volume has already declined to about 13 %, consistent with the current observation that many coral reefs are already under severe stress (e.g., Pandolfi et al., 2011; Ricke et al., 2013). In the RCP 4.5 control run, we observe that the potential tropical coral reef habitat volume reaches 0 % in the year 2056 and remains so thereafter (Fig. 5 a) with a decrease in aragonite oversaturation levels being the main driver.

In our injection experiments, we find an increase in the potential tropical coral reef habitat volume right after the start of oceanic CCS (Fig. 5 a). Despite this, in the *A2* simulation the respective volume still approaches zero (0.2 %) in the

year 2044, although it does then steadily increase again until it reaches 21 % at the end of the simulation, i.e. still 16 % less than its preindustrial state, but also 8% more compared to the current situation (Figs. 5 a, b). The respective habitat volume in the *A3* simulation shows an earlier and stronger increase, resulting in a habitat volume of about 34 %, i.e. 3 % less than pre-industrial, at the end of the model experiment (Fig. 5 a).

410 In preindustrial times, water masses in the upper ocean (0 - 130 m) that were undersaturated with respect to aragonite ( $\Omega_{AR} < 1$ ) were negligible (0.2 %; Fig. 5 c, green star). This undersaturated volume has increased to about 1 % at the beginning of our simulations. Over the course of the control run, we observe an increase with a maximum of about 9 % in the year 2212. Subsequently, the respective undersaturated volume slightly decreases until it reaches a minimum of about 7 % at the end of the simulation. Undersaturated surface waters are located in higher latitudes (Fig. 5 d), which is for instance con-  
415 sidered a threat to pteropods like *Limacina helicina* (e.g., Lischka et al., 2011). In the *A2* and *A3* simulations, the respective undersaturated volumes are significantly smaller and never exceed 2 % of the surface ocean volume (Fig 5 c, d). Undersaturated surface-water volumes in the *A2* run are slightly higher than those in the *A3* simulation.

Further, we assess the volume that is undersaturated with respect to aragonite in the intermediate and deep ocean (130 - 6080 m) and present it as a %-fraction of the entire interior ocean volume ( $1.311 \times 10^9 \text{ km}^3$ ). This is of interest since  
420 changes in interior-ocean  $\Omega_{AR}$  may affect the growth conditions of cold-water corals (e.g., Guinotte et al., 2008; Flögel et al., 2014; Roberts and Cairns, 2014) and the dissolution depth of sinking aragonite particles.

At the beginning of the simulations, 69 % of the interior oceans are undersaturated with respect to aragonite, which is about 3 % more than preindustrial (Fig. 5 e). Subsequently, the increase in undersaturated water volume is similar among all simulations until about the year 2122, when the undersaturated volume in the control simulation continues to increase until  
425 its maximum of about 91 % in the year 2713. The undersaturated volumes in the injection experiments show only a very small increase after year 2122, leading until year 3020 to values of about 86 % in both injection simulations (Fig. 5 e). The bigger volume in the control run is likely caused by acidified waters at the ocean surface that ventilate intermediate and mode waters (Resplandy et al., 2013).

Figs. 6 a, b shows a similar trade-off in the injection experiments of the second and third approach in year 3020 as  
430 for pH (Figs. 4 a, b), i.e. an increase of the aragonite saturation states in the upper ocean and an increase of undersaturated conditions in the intermediate and deep ocean. Further, the effects of  $\text{CaCO}_3$  sediment dissolution and continental weathering lead to the highest benefit in the upper ocean and the lowest harm in the intermediate and deep ocean (Figs. 6 a, b). See Sect. 1 and Figs. S5-9 in the Supplement about the different evolution of the aragonite saturation horizon ( $\Omega_{AR}=1$ , ASH) in the RCP 4.5 control run and the *A2* and *A3* experiments.

435 As mentioned in the introduction, the neglect of non- $\text{CO}_2$  greenhouse gases in our injection experiments underesti-

440 mates the required cumulative CO<sub>2</sub> injections and associated trade-offs in each approach. This is due to the fact that non-CO<sub>2</sub> greenhouse gases directly affect the Earth's energy balance, resulting in either warming or cooling of the atmosphere. Gases like methane and nitrous oxide warm the Earth, while aerosols such as sulfate cool it (e.g., Myhre et al., 2013). The current net effect is a small positive radiative forcing, which, although controversially debated, is expected to increase as the cooling effect of sulfate aerosols is predicted to decline over the next half of this century (Moss et al., 2010; Hansen et al., 2017; Rao et al., 2017).

#### 4. Conclusion

445 This modeling study explores the potential and biogeochemical impacts of three different approaches to control the amount of oceanic CCS as a means to fill the gap between the CO<sub>2</sub> emissions and climate impacts of the RCP 4.5 scenario and a specific temperature target such as the 1.5°C climate target. We do so from the perspective of using only ocean CCS for this purpose.

The analysis of the *A1* simulation (first approach) reveals that because of committed warming and eventually outgassing of some of the injected CO<sub>2</sub>, it would not be sufficient to inject the residual of the RCP 4.5 CO<sub>2</sub> emissions (964 Gt C in total) until the year 3020 once a global mean temperature of 1.5°C is exceeded for the first time (year 2045). In order to overcome the observed overshoot of +0.7°C by year 3020 in the first approach, we find that about 600 Gt C (62 %) more need to be injected, as indicated by the default simulation of the second approach, i.e., *A2* run (Figs. 1 a, b, 2 b).

To follow the atmospheric CO<sub>2</sub> concentration of the RCP/ECP 2.6 as closely as possible by applying oceanic CCS would require cumulative CO<sub>2</sub> injections of about 2200 Gt C until the year 3020. However, global mean temperature reaches +0.9°C by the end of the *A3* simulation and thus undershoots the respective climate target.

455 The cumulative CO<sub>2</sub> injections in the second and third approach and the respective required emission reductions questions the suitability of oceanic CCS for the aspired target on such a timescale, because the outgassed CO<sub>2</sub> amounts, which are 607 and 900 Gt C by year 3020, respectively (Figs. 1 d, 2 b, c), would need to be re-captured by additional technologies such as Direct Air Capture and subsequently re-injected into the deep ocean. The required emission reductions of about 955 Gt C in the second and about 1300 Gt C in the third approach, point to the massive CO<sub>2</sub> amounts that would need to get removed from the atmosphere under the RCP/ECP 4.5 CO<sub>2</sub> emission scenario in order to be compatible with the 1.5°C or lower climate target on a millennium timescale.

460 From the integrated analysis of the model runs from all three approaches (i.e. eye-fitted lines in Figs. 2 b, c), we quantify the amount of emission reduction and oceanic CCS, respectively, required to lower the model-predicted global mean temperature by 1°C. In the near-term (2100) this measure is 446 Gt C / 1°C for both oceanic CCS and the required emission

465 reductions as only a tiny fraction has outgassed until that point in time (see section 3.1). On a millennial timescale this measure is about 951 Gt C / 1°C for oceanic CCS and about 595 Gt C / 1°C (37 % less) for the required emission reductions, respectively, highlighting that a large fraction of injected CO<sub>2</sub> has outgassed.

Inclusion of CaCO<sub>3</sub> sediment and weathering feedbacks reduces the required cumulative CO<sub>2</sub> injections and required emission reductions by about 6 % in the first and third approach and by about 11 % in the second approach, respectively (Fig. 2 b, c). The neglect of non-CO<sub>2</sub> greenhouse gases in the applied forcing of the injection experiments underestimates the cumulative CO<sub>2</sub> injections that would be required. In general, it is estimated that non-CO<sub>2</sub> climate agents contribute between 10-30 % of the total forcing (Friedlingstein et al., 2014) until the year 2100 and for business-as-usual simulations. Extrapolating the current contribution of greenhouse gases other than CO<sub>2</sub> qualitatively into the future we expect that CO<sub>2</sub>-injections of the magnitude of the *A3* simulation may be required to stay safely below +1.5°C on a millennium timescale. We propose, that our generalized estimates of emission reduction and oceanic CCS per 1°C cooling, respectively, may be used in the future to quantify additional efforts in order to compensate for non-CO<sub>2</sub> greenhouse gases induced warming.

With respect to the biogeochemical impacts in the injection simulations of the second and third approach, we observe an increase of average pH and aragonite saturation states in the surface ocean (0 - 130 m) after the start of oceanic CCS, when compared to the RCP 4.5 control run. These are due to the direct effect of a lower atmospheric pCO<sub>2</sub> in the injection experiments, i.e., reduced upper ocean acidification (section 3.3).

Potential tropical coral reef habitats in the upper ocean volume, which are here defined as  $\Omega_{AR} > 3.4$  and ocean temperatures between 21°C and 28°C, are observed to steadily increase after the start of oceanic CCS in the *A2* run and the *A3* simulation (Fig. 5 a), almost reaching preindustrial levels in the *A3* simulation. However, the potential coral reef habitats in the respective injection experiments are close to zero for several decades (Fig. 5 a), raising the question if coral reefs would be able to recover from globally inhabitable conditions after this period of time. Local application of ocean alkalization (Feng et al., 2016) may be a technical solution to protect coral reefs during this time period, in particular in regions where coral reefs are essential for shoreline protections.

The observed reduction of ocean acidification in the surface ocean comes at the expense of more strongly acidified water masses in the intermediate and deep ocean, with strongest reductions in pH in the vicinity of the seven injections sites (Figs. 3 d, e). Although it is difficult to predict how this would impact marine ecosystems, it is very likely that such conditions would put them under severe stress.

Overall, the trade-off between injection-related damages in the deep ocean and benefits in the upper ocean illustrate the challenge of evaluating the offset of local harm against global benefit, which is very likely the subject of any deliberate CO<sub>2</sub> removal method (e.g., Smith et al., 2016; Boysen et al., 2017; Fuss et al., 2018). Leaving aside the massive economic

495 effort associated with ocean CCS of the size needed to reach the 1.5°C climate target (even when starting from a currently  
optimistic RCP 4.5 mitigation scenario), humanity will have to decide whether severe stress and potential loss of deep-sea  
ecosystems is acceptable when paid off by conserving or restoring surface ocean ecosystems to a large extent.

500

505

510

#### **Data availability**

The model data used to generate the table and figures is available online at

515 [https://data.geomar.de/thredds/catalog/open\\_access/reith\\_et\\_al\\_2019\\_esd/catalog.html](https://data.geomar.de/thredds/catalog/open_access/reith_et_al_2019_esd/catalog.html)

#### **Author contributions**

All authors conceived and designed the experiments. FR implemented the experiments with contributions from WK and JG.  
FR performed the experiments and analysed the data. FR wrote the manuscript with contributions from all co-authors.

#### **Competing interests**

520 The authors declare that they have no conflict of interest.

#### **Acknowledgments**

The Deutsche Forschungsgemeinschaft (DFG) financially supported this study via the Priority Program 1689.

## References

- Allen, M. R., Frame, D. J., Huntingford, C., Jones, C. D., Lowe, J. A., Meinshausen, M. and Meinshausen, N.: Warming caused  
525 by cumulative carbon emissions towards the trillionth tonne, *Nature*, 458(7242), 1163–1166, doi:10.1038/nature08019, 2009.
- Archer, D.: A data-driven model of the global calcite lysocline, *Global Biogeochem. Cycles*, 10(3), 511–526,  
doi:10.1029/96GB01521, 1996.
- Archer, D.: Fate of fossil fuel CO<sub>2</sub> in geologic time, *J. Geophys. Res. C Ocean.*, 110(9), 1–6, doi:10.1029/2004JC002625, 2005.
- Archer, D., Kheshgi, H. S. and Maier-Reimer, E.: Dynamics of fossil fuel CO<sub>2</sub> neutralization by marine CaCO<sub>3</sub>, *Glob. Biogeo-*  
530 *chem. Cycles*, 12(2), 259–276, 1998.
- Bigalke, N. K., Rehder, G. and Gust, G.: Experimental investigation of the rising behavior of CO<sub>2</sub> droplets in seawater under  
hydrate-forming conditions, *Environ. Sci. Technol.*, 42(14), 5241–5246, doi:10.1021/es800228j, 2008.
- Bitz, C. M. and Lipscomb, W. H.: An energy-conserving thermodynamic model of sea ice, *J. Geophys. Res.*, 104(C7), 15669,  
doi:10.1029/1999JC900100, 1999.
- Boysen, L., Lucht, W., Schellnhuber, H., Gerten, D., Heck, V. and Lenton, T.: The limits to global-warming mitigation by  
535 terrestrial carbon removal, *Earth's Future*, 5(5), 1–12, doi:10.1002/ef2.203, 2017.
- Cao, L., Eby, M., Ridgwell, A., Caldeira, K., Archer, D., Ishida, A., Joos, F., Matsumoto, K., Mikolajewicz, U., Mouchet, A.,  
Orr, J. C., Plattner, G.-K., Schlitzer, R., Tokos, K., Totterdell, I., Tschumi, T., Yamanaka, Y. and Yool, A.: The role of ocean  
transport in the uptake of anthropogenic CO<sub>2</sub>, *Biogeosciences*, 6(3), 375–390, doi:10.5194/bg-6-375-2009, 2009.
- 540 Ciais, P., Sabine, C., Bala, G., Bopp, L., Brovkin, V., Canadell, J., Chhabra, a, DeFries, R., Galloway, J., Heimann, M., Jones, C.,  
Quéré, C. Le, Myneni, R. B., Piao, S. and Thornton, P.: *Carbon and Other Biogeochemical Cycles*, *Clim. Chang.*, 2013 -  
*Phys. Sci. Basis*, doi:10.1017/CBO9781107415324.015, 2013.
- Clarke, L. E., Jiang, K., Akimoto, K., Babiker, M., Blanford, G., Fisher-Vanden, K., Hourcade, J.-C., Krey, V., Kriegler, E.,  
Löschel, A., McCollum, D., Paltsev, S., Rose, S., Shukla, P. R., Tavoni, M., van der Zwaan, B. C. C. and van Vuuren, D. P.:  
545 Assessing transformation pathways, *Clim. Chang.* 2014 Mitig. *Clim. Chang. Contrib. Work. Gr. III to Fifth Assess. Rep. Inter-*  
*tergov. Panel Clim. Chang.*, 413–510, 2014.
- Cléménçon, R.: The Two Sides of the Paris Climate Agreement, *J. Environ. Dev.*, 25(1), 3–24, doi:10.1177/1070496516631362,  
2016.
- Collins, M., Knutti, R., Arblaster, J., Dufresne, J.-L., Fichet, T., Friedlingstein, P., Gao, X., Gutowski, W. J., Johns, T.,  
550 Krinner, G., Shongwe, M., Tebaldi, C., Weaver, A. J. and Wehner, M.: Long-term Climate Change: Projections,  
Commitments and Irreversibility, *Clim. Chang.* 2013 *Phys. Sci. Basis. Contrib. Work. Gr. I to Fifth Assess. Rep. Intergov.*  
*Panel Clim. Chang.*, 1029–1136, doi:10.1017/CBO9781107415324.024, 2013.
- DeVries, T. and Primeau, F.: Dynamically and Observationally Constrained Estimates of Water-Mass Distributions and Ages in  
the Global Ocean, *J. Phys. Oceanogr.*, 41(12), 2381–2401, doi:10.1175/JPO-D-10-05011.1, 2011.
- 555 Dickson, A. G. and Millero, F. J.: A comparison of the equilibrium constants for the dissociation of carbonic acid in seawater  
media, *Deep Sea Res. Part A, Oceanogr. Res. Pap.*, 34(10), 1733–1743, doi:10.1016/0198-0149(87)90021-5, 1987.
- Doney, S. C., Fabry, V. J., Feely, R. a and Kleypas, J. a: Ocean acidification: the other CO<sub>2</sub> problem., *Ann. Rev. Mar. Sci.*, 1,  
169–92, doi:10.1146/annurev.marine.010908.163834, 2009.
- Fabricius, K. E., Klübenschedl, A., Harrington, L., Noonan, S. and De'ath, G.: In situ changes of tropical crustose coralline  
560 algae along carbon dioxide gradients, *Sci. Rep.*, 5, 9537, doi:10.1038/srep09537, 2015.
- Fanning, A. F. and Weaver, A. J.: An atmospheric energy-moisture balance model: Climatology, interpentadal climate change,  
and coupling to an ocean general circulation model, *J. Geophys. Res.*, 101(D10), 15111, doi:10.1029/96JD01017, 1996.

- Feng, E. Y., Keller, D. P., Koeve, W. and Oschlies, A.: Could artificial ocean alkalization protect tropical coral ecosystems from ocean acidification?, *Environ. Res. Lett.*, 11(7), 74008, doi:10.1088/1748-9326/11/7/074008, 2016.
- 565 Field, C., Barros, V., Stocker, T. and Dahe, Q.: IPCC workshop on impacts of ocean acidification on marine biology and ecosystems. Workshop report. [online] Available from: [https://www.etde.org/etdeweb/details\\_open.jsp?osti\\_id=1032894](https://www.etde.org/etdeweb/details_open.jsp?osti_id=1032894), 2011.
- Flögel, S., Dullo, W. C., Pfannkuche, O., Kiriakoulakis, K. and Rüggeberg, A.: Geochemical and physical constraints for the occurrence of living cold-water corals, *Deep. Res. Part II Top. Stud. Oceanogr.*, 99, 19–26, doi:10.1016/j.dsr2.2013.06.006, 2014.
- 570 Friedlingstein, P., Andrew, R. M., Rogelj, J., Peters, G. P., Canadell, J. G., Knutti, R., Luderer, G., Raupach, M. R., Schaeffer, M., Vuuren, D. P. Van and Quéré, C. Le: Persistent growth of CO<sub>2</sub> emissions and implications for reaching climate targets, *Nat. Publ. Gr.*, 7(10), 709–715, doi:10.1038/ngeo2248, 2014.
- Fuss, S., Canadell, J. G., Peters, G. P., Tavoni, M., Andrew, R. M., Ciais, P., Jackson, R. B., Jones, C. D., Kraxner, F., Nakicenovic, N., Le Quere, C., Raupach, M. R., Sharifi, A., Smith, P., Yamagata, Y., Le Quéré, C., Raupach, M. R., Sharifi, A.,
- 575 Smith, P. and Yamagata, Y.: Betting on negative emissions, *Nat. Clim. Chang.*, 4(10), 850–853, doi:10.1038/nclimate2392, 2014.
- Le Quere, C., Andrew, R. M., Canadell, J. G., Sitch, S., Ivar Korsbakken, J., Peters, G. P., Manning, A. C., Boden, T. A., Tans, P. P., Houghton, R. A., Keeling, R. F., Alin, S., Andrews, O. D., Anthoni, P., Barbero, L., Bopp, L., Chevallier, F., Chini, L. P., Ciais, P., Currie, K., Delire, C., Doney, S. C., Friedlingstein, P., Gkritzalis, T., Harris, I., Hauck, J., Haverd, V.,
- 580 Hoppema, M., Klein Goldewijk, K., Jain, A. K., Kato, E., Körtzinger, A., Landschützer, P., Lefèvre, N., Lenton, A., Lienert, S., Lombardozi, D., Melton, J. R., Metzl, N., Millero, F., Monteiro, P. M. S., Munro, D. R., Nabel, J. E. M. S., Nakaoka, S. I., O'Brien, K., Olsen, A., Omar, A. M., Ono, T., Pierrot, D., Poulter, B., Rodenbeck, C., Salisbury, J., Schuster, U., Schwinger, J., Sferian, R., Skjelvan, I., Stocker, B. D., Sutton, A. J., Takahashi, T., Tian, H., Tilbrook, B., Van Der Laan-Luijkx, I. T., Van Der Werf, G. R., Viovy, N., Walker, A. P., Wiltshire, A. J. and Zaehle, S.: Global Carbon Budget
- 585 2016, *Earth Syst. Sci. Data*, 8(2), doi:10.5194/essd-8-605-2016, 2016.
- Gasser, T., Guivarch, C., Tachiiri, K., Jones, C. D. and Ciais, P.: Negative emissions physically needed to keep global warming below 2 °C, *Nat. Commun.*, 6, 7958, doi:10.1038/ncomms8958, 2015.
- Gehlen, M., Séférian, R., Jones, D. O. B., Roy, T., Roth, R., Barry, J., Bopp, L., Doney, S. C., Dunne, J. P., Heinze, C., Joos, F., Orr, J. C., Resplandy, L., Segschneider, J. and Tjiputra, J.: Projected pH reductions by 2100 might put deep North Atlantic
- 590 biodiversity at risk, *Biogeosciences*, 11(23), 6955–6967, doi:10.5194/bg-11-6955-2014, 2014.
- Gillett, N. P., Arora, V. K., Zickfeld, K., Marshall, S. J. and Merryfield, W. J.: Ongoing climate change following a complete cessation of carbon dioxide emissions, *Nat. Geosci.*, 4(2), 83–87, doi:10.1038/ngeo1047, 2011.
- Guinotte, J. M. and Fabry, V. J.: Ocean acidification and its potential effects on marine ecosystems, *Ann. N. Y. Acad. Sci.*, 1134, 320–342, doi:10.1196/annals.1439.013, 2008.
- 595 Guinotte, J. M., Orr, J., Cairns, S., Freiwald, A., Morgan, L. and George, R.: Will human-induced changes in seawater chemistry alter the distribution of deep-sea scleractinian corals?, *Front. Ecol. Environ.*, 4(3), 141–146, doi:10.1890/1540-9295(2006)004[0141:WHCISC]2.0.CO;2, 2006.
- Hansen, J., Sato, M., Kharecha, P., Schuckmann, K. Von and Beerling, D. J.: Young people 's burden : requirement of negative CO<sub>2</sub> emissions, , 577–616, 2017.
- 600 Hoffert, M. I., Wey, Y. C., Callegari, A. J. and Broecker, W. S.: Atmospheric response to deep-sea injections of fossil-fuel carbon dioxide, *Clim. Change*, 2(1), 53–68, doi:10.1007/BF00138226, 1979.
- Horton, J. B., Keith, D. W. and Honegger, M.: Implications of the Paris Agreement for Carbon Dioxide Removal and Solar



Geoengineering, , 1–10, 2016.

- Intergovernmental Panel on Climate Change (IPCC), [Metz, B., Davidson, O., de Coninck, H. C., Loos, M., and Meyer, L. A. (eds.)]: Special Report on Carbon Dioxide Capture and Storage, Cambridge University Press, Cambridge, United Kingdom and New York, NY, USA, 422pp., 2005.
- Intergovernmental Panel on Climate Change (IPCC): Workshop Report of the IPCC Workshop on Impacts of Ocean Acidification on Marine Biology and Ecosystems [Field, C.B., Barros, V., Stocker, T.F., Qin, D. , Mach, K.J., Plattner, G.-K., Mastrandrea, M.D., Tignor, M., and Ebi, K.L. (eds.)]. IPCC Working Group II Technical Support Unit, Carnegie Institution, Stanford, California, United States of America, pp. 164, 2011.
- Jain, A. K. and Cao, L.: Assessing the effectiveness of direct injection for ocean carbon sequestration under the influence of climate change, *Geophys. Res. Lett.*, 32, L09609, doi:10.1029/2005GL022818, 2005.
- Keeling, R. F.: Triage in the greenhouse, *Nat. Geosci.*, 2(12), 820–822, doi:10.1038/ngeo701, 2009.
- Keller, D. P., Oschlies, a. and Eby, M.: A new marine ecosystem model for the University of Victoria Earth System Climate Model, *Geosci. Model Dev.*, 5(5), 1195–1220, doi:10.5194/gmd-5-1195-2012, 2012.
- Keller, D. P., Feng, E. Y. and Oschlies, A.: Potential climate engineering effectiveness and side effects during a high carbon dioxide-emission scenario., *Nat. Commun.*, 5, 3304, doi:10.1038/ncomms4304, 2014.
- Kleypas, J. A., et al.: Environmental limits to coral reef development: Where do we draw the line?, *Am. Zool.*, 39(1), 146–159, 1999.
- Knopf, B., Fuss, S., Hansen, G., Creutzig, F., Minx, J. and Edenhofer, O.: From Targets to Action: Rolling up our Sleeves after Paris, *Glob. Challenges*, 1(2), 1600007, doi:10.1002/gch2.201600007, 2017.
- Knutti, R., Rogelj, J., Sedláček, J. and Fischer, E. M.: A scientific critique of the two-degree climate change target, *Nat. Geosci.*, 9(1), doi:10.1038/ngeo2595, 2015.
- Koeve, W. and Oschlies, A.: Potential impact of DOM accumulation on fCO<sub>2</sub> and carbonate ion computations in ocean acidification experiments, *Biogeosciences*, 9(10), 3787–3798, doi:10.5194/bg-9-3787-2012, 2012.
- Le Quere, C., Andrew, R. M., Canadell, J. G., Sitch, S., Ivar Korsbakken, J., Peters, G. P., Manning, A. C., Boden, T. A., Tans, P. P., Houghton, R. A., Keeling, R. F., Alin, S., Andrews, O. D., Anthoni, P., Barbero, L., Bopp, L., Chevallier, F., Chini, L. P., Ciais, P., Currie, K., Delire, C., Doney, S. C., Friedlingstein, P., Gkritzalis, T., Harris, I., Hauck, J., Haverd, V., Hoppema, M., Klein Goldewijk, K., Jain, A. K., Kato, E., Körtzinger, N., Lenton, A., Lienert, S., Lombardozzi, D., Melton, J. R., Metzl, N., Millero, F., Monteiro, P. M. S., Munro, D. R., Nabel, J. E. M. S., Nakaoka, S. I., O'Brien, K., Olsen, A., Omar, A. M., Ono, T., Pierrot, D., Poulter, Salisbury, J., Schuster, U., Schwinger, J., R., Skjelvan, I., Stocker, B. D., Sutton, A. J., Takahashi, T., Tian, H., Tilbrook, B., Van Der Laan-Luijkx, I. T., Van Der Werf, G. R., Viovy, N., Walker, A. P., Wiltshire, A. J. and Zaehle, S.: Global Carbon Budget 2016, *Earth Syst. Sci. Data*, 8(2), doi:10.5194/essd-8-605-2016, 2016.
- Leung, D. Y. C., Caramanna, G. and Maroto-Valer, M. M.: An overview of current status of carbon dioxide capture and storage technologies, *Renew. Sustain. Energy Rev.*, 39, 426–443, doi:10.1016/j.rser.2014.07.093, 2014.
- Lewis, E. and Wallace, D.: Program developed for CO<sub>2</sub> system calculations, Ornl/Cdiac-105, 1–21, doi:4735, 1998.
- Lischka, S., Büdenbender, J., Boxhammer, T. and Riebesell, U.: Impact of ocean acidification and elevated temperatures on early juveniles of the polar shelled pteropod *Limacina helicina*: Mortality, shell degradation, and shell growth, *Biogeosciences*, 8(4), 919–932, doi:10.5194/bg-8-919-2011, 2011.
- MacDougall, A. H.: The Transient Response to Cumulative CO<sub>2</sub> Emissions: a Review, *Curr. Clim. Chang. Reports*, 2(1), 39–47, doi:10.1007/s40641-015-0030-6, 2016.
- Marchetti, C.: On geoengineering and the CO<sub>2</sub> problem, *Clim. Change*, 1(1), 59–68, doi:10.1007/BF00162777, 1977.

- Matthews, H. D. and Caldeira, K.: Stabilizing climate requires near-zero emissions, *Geophys. Res. Lett.*, 35(4), 1–5, doi:10.1029/2007GL032388, 2008.
- 645 Matthews, H. D., Gillett, N. P., Stott, P. a and Zickfeld, K.: The proportionality of global warming to cumulative carbon emissions., *Nature*, 459(7248), 829–32, doi:10.1038/nature08047, 2009.
- Mehrbach, C., Culberson, C. H., Hawley, J. E. and Pytkowicx, R. M.: Measurement of the Apparent Dissociation Constants of Carbonic Acid in Seawater At Atmospheric Pressure1, *Limnol. Oceanogr.*, 18(6), 897–907, doi:10.4319/lo.1973.18.6.0897, 1973.
- 650 Meinshausen, M., Smith, S. J., Calvin, K., Daniel, J. S., Kainuma, M. L. T., Lamarque, J., Matsumoto, K., Montzka, S. a., Raper, S. C. B., Riahi, K., Thomson, a., Velders, G. J. M. and van Vuuren, D. P. P.: The RCP greenhouse gas concentrations and their extensions from 1765 to 2300, *Clim. Change*, 109(1), 213–241, doi:10.1007/s10584-011-0156-z, 2011.
- Mengis, N., Partanen, A. I., Jalbert, J. And Matthews, H. D.: 1.5°C carbon budget dependent on carbon cycle uncertainty and future non-CO<sub>2</sub> forcing, *Sci. Rep.*, 8(1), 1-7, doi:10.1038/s41598-018-24241-1, 2018.
- 655 Meissner, K. J., Weaver, a. J., Matthews, H. D. and Cox, P. M.: The role of land surface dynamics in glacial inception: A study with the UVic Earth System Model, *Clim. Dyn.*, 21(7–8), 515–537, doi:10.1007/s00382-003-0352-2, 2003.
- Moss, R. H., Edmonds, J. a, Hibbard, K. a, Manning, M. R., Rose, S. K., van Vuuren, D. P., Carter, T. R., Emori, S., Kainuma, M., Kram, T., Meehl, G. a, Mitchell, J. F. B., Nakicenovic, N., Riahi, K., Smith, S. J., Stouffer, R. J., Thomson, A. M., Weyant, J. P. and Wilbanks, T. J.: The next generation of scenarios for climate change research and assessment., *Nature*, 660 463(7282), 747–56, doi:10.1038/nature08823, 2010.
- Mucci A.: The solubility of calcite and aragonite in seawater at various salinities, temperatures and one atmosphere total pressure. *Amer. Jour. Sci.* 283: 780-799, 1983.
- Myhre, G., Samset, B. H., Schulz, M., Balkanski, Y., Bauer, S., Berntsen, T. K., Bian, H., Bellouin, N., Chin, M., Diehl, T., Easter, R. C., Feichter, J., Ghan, S. J., Hauglustaine, D., Iversen, T., Kinne, S., Kirkevåg, A., Lamarque, J. F., Lin, G., Liu, 665 X., Lund, M. T., Luo, G., Ma, X., Van Noije, T., Penner, J. E., Rasch, P. J., Ruiz, A., Seland, Skeie, R. B., Stier, P., Takemura, T., Tsigaridis, K., Wang, P., Wang, Z., Xu, L., Yu, H., Yu, F., Yoon, J. H., Zhang, K., Zhang, H. and Zhou, C.: Radiative forcing of the direct aerosol effect from AeroCom Phase II simulations, *Atmos. Chem. Phys.*, 13(4), 1853–1877, doi:10.5194/acp-13-1853-2013, 2013.
- Ogden, L. E.: Marine Life on Acid, *Bioscience*, 63(5), 322–328, doi:10.1525/bio.2013.63.5.3, 2013.
- 670 Orr, J. C., Najjar, C. R., Sabine, C. L., and Joos, F.: Abiotic-Howto. Internal OCMIP Report, LCSE/CEA Saclay, Gif-sur-Yvette, France, 25pp, 1999.
- Orr, J. C., Aumont, O., Yool, A., Plattner, K., Joos, F., Maier-Reimer, E., Weirig, M. -F., Schlitzer, R., Caldeira, K., Wicket, M., and Matear, R.: Ocean CO<sub>2</sub> Sequestration Efficiency from 3-D Ocean Model Comparison, in *Greenhouse Gas Control Technologies*, edited by Williams, D., Durie, B., McMullan, P., Paulson, C., and Smith, A., CSIRO, Collingwood, Australia, pp. 675 469-474, 2001.
- Orr, J. C.: Modelling of ocean storage of CO<sub>2</sub> - The GOSAC study, Report PH4/37, IEA Greenhouse gas R&D Programme, 96pp., 2004.
- Pacanowski, R. C.: MOM2: Documentation, User's Guide and Reference Manual, GFDL Ocean Tech. Rep., 3.2, 329pp, 1996.
- Pandolfi, J. M., Connolly, S. R., Marshall, D. J. and Cohen, A. L.: Projecting Coral Reef Futures Under Global Warming and 680 Ocean Acidification, *Science* (80- ), 333(6041), 418–422, doi:10.1126/science.1204794, 2011.
- Rao, S., Klimont, Z., Smith, S. J., Van Dingenen, R., Dentener, F., Bouwman, L., Riahi, K., Amann, M., Bodirsky, B. L., van Vuuren, D. P., Reis, L. A., Calvin, K., Drouet, L., Fricko, O., Fujimori, S., Gernaat, D., Havlik, P., Harmsen, M., Hasegawa,

- T., Heyes, C., Hilaire, J., Luderer, G., Masui, T., Stehfest, E., Strefler, J., van der Sluis, S., and Tavoni, M.: Future air pollution in the Shared Socio-economic Pathways, *Global Environ. Change*, 42, 346–358, 2017.
- 685 Reith, F., Keller, D. P. and Oeschler, A.: Revisiting ocean carbon sequestration by direct injection: A global carbon budget perspective, *Earth Syst. Dyn.*, 7(4), 797–812, doi:10.5194/esd-7-797-2016, 2016.
- Resplandy, L., Bopp, L., Orr, J. C. and Dunne, J. P.: Role of mode and intermediate waters in future ocean acidification: Analysis of CMIP5 models, *Geophys. Res. Lett.*, 40(January), 3091–3095, doi:10.1002/grl.50414, 2013.
- Ricke, K. L., Orr, J. C., Schneider, K. and Caldeira, K.: Risks to coral reefs from ocean carbonate chemistry changes in recent earth system model projections, *Environ. Res. Lett.*, 8(3), 34003, doi:10.1088/1748-9326/8/3/034003, 2013.
- 690 Ridgwell, A., Rodengen, T. J. and Kohfeld, K. E.: Geographical variations in the effectiveness and side effects of deep ocean carbon sequestration, *Geophys. Res. Lett.*, 38(17), 1–6, doi:10.1029/2011GL048423, 2011.
- Roberts, J. M. and Cairns, S. D.: Cold-water corals in a changing ocean, *Curr. Opin. Environ. Sustain.*, 7, 118–126, doi:10.1016/j.cosust.2014.01.004, 2014.
- 695 Rockström, J., Steffen, W., Noone, K., Persson, Å., Chapin III, F. S., Lambin, E. F., Lenton, T. M., Scheffer, M., Folke, C., Schellnhuber, H., Nykvist, B., de Wit, C. A., Hughes, T., van der Leeuw, S., Rodhe, H., Sörlin, S., Snyder, P. K., Costanza, R. and Al., E.: Planetary Boundaries: Exploring the Safe Operating Space for Humanity, *Ecol. Soc.*, 14(2), 32, doi:10.1038/461472a, 2009.
- Rockström, J., Schellnhuber, H., Hoskins, B., Ramanathan, V., Brasseur, G., Gaffney, O., Nobre, C., Meinshausen, M. and 700 Lucht, W.: Earth ' s Future The world ' s biggest gamble Earth ' s Future, *Earth's Futur.*, 4, 465–470, doi:10.1002/2016EF000392.Received, 2016.
- Rogelj, J., Elzen, M. Den, Fransen, T., Fekete, H., Winkler, H., Schaeffer, R., Sha, F., Riahi, K. and Meinshausen, M.: Perspective : Paris Agreement climate proposals need boost to keep warming well below 2 ° C, *Nat. Clim. Chang.*, 534(June), doi:10.1038/nature18307, 2016.
- 705 Sabine, C. L., Feely, R. A., Gruber, N., Key, R. M., Lee, K., Bullister, J. L., Wanninkhof, R., Wong, C. S., Wallace, D. W. R., Tilbrook, B., Millero, F. J., Peng, T.-H., Kozyr, A., Ono, T. and Rios, A. F.: The oceanic sink for anthropogenic CO<sub>2</sub>, *Science*, 305(5682), 367–71, doi:10.1126/science.1097403, 2004.
- Sanderson, B. M., O'Neill, B. C. and Tebaldi, C.: What would it take to achieve the Paris temperature targets?, *Geophys. Res. Lett.*, 43(13), 7133–7142, doi:10.1002/2016GL069563, 2016.
- 710 Sarmiento, J. L. and Toggweiler, J. R.: A new model for the role of the oceans in determining atmospheric PCO<sub>2</sub>, *Nature*, 308(5960), 621–624 [online] Available from: <http://dx.doi.org/10.1038/308621a0>, 1984.
- Schubert, R., Schellnhuber, H. J., Buchmann, N., Epiney, A., Griesshammer, R., Kulesa, M., Messner, D., Rahmstorf, S. and Schmid, J.: *The Future Oceans – Warming Up, Rising High, Turning Sour.*, 2006.
- Smith, P., Davis, S. J., Creutzig, F., Fuss, S., Minx, J., Gabrielle, B., Kato, E., Jackson, R. B., Cowie, A., Kriegler, E., van 715 Vuuren, D. P., Rogelj, J., Ciais, P., Milne, J., Canadell, J. G., McCollum, D., Peters, G., Andrew, R., Krey, V., Shrestha, G., Friedlingstein, P., Gasser, T., Grubler, A., Heidug, W. K., Jonas, M., Jones, C. D., Kraxner, F., Littleton, E., Lowe, J., Moreira, J. R., Nakicenovic, N., Obersteiner, M., Patwardhan, A., Rogner, M., Rubin, E., Sharifi, A., Torvanger, A., Yamagata, Y., Edmonds, J. and Yongsung, C.: Biophysical and economic limits to negative CO<sub>2</sub> emissions, *Nat. Clim. Chang.*, 6(1), doi:10.1038/nclimate2870\rrhttp://www.nature.com/nclimate/journal/v6/n1/abs/nclimate2870.html#supplementary- 720 information, 2016.
- UNFCCC. Conference of the Parties: Adoption of the Paris Agreement. Proposal by the President., *Paris Clim. Chang. Conf.* - Novemb. 2015, COP 21, 21932(December 2015), 31 [online] Available from:

<http://unfccc.int/resource/docs/2015/cop21/eng/109.pdf>, 2015.

- van Heuven, S., Pierrot, D., Lewis, E., and Wallace, D. W.R.: MATLAB Program Developed for CO<sub>2</sub> System Calculations, ORNL/CDIAC-105b, Carbon Dioxide Information Analysis Center, Oak Ridge National Laboratory, US Department of Energy, Oak Ridge, Tennessee,
- 725 <ftp://cdiac.ornl.gov/pub/co2sys/CO2SYScalcMATLAB>, 2009.
- Volk, T. and Hoffert, M. I.: Ocean carbon pumps: Analysis of relative strengths and efficiencies in ocean driven atmospheric CO<sub>2</sub> changes, in *The Carbon Cycle and Atmospheric CO<sub>2</sub>: Natural variations Archaeaen to present*, ed. by Sundquist, E.T. and Broecker, W.S., Geophys. Monogr. Ser., 32, 99-110, AGU, Washington, D.C., 1985.
- 730 Weaver, A. J., Eby, M., Wiebe, E. C., Bitz, C. M., Duffy, P. B., Ewen, T. L., Fanning, A. F., Holland, M. M., MacFadyen, A., Matthews, H. D., Meissner, K. J., Saenko, O., Schmittner, A., Wang, H. and Yoshimori, M.: The UVic earth system climate model: Model description, climatology, and applications to past, present and future climates, *Atmosphere-Ocean*, 39(4), 361–428, doi:10.1080/07055900.2001.9649686, 2001.
- 735 Williamson, P.: Emissions reduction: Scrutinize CO<sub>2</sub> removal methods, *Nature*, 530(153), 5–7, doi:10.1038/530153a, 2016.
- Zeebe, R. E.: History of Seawater Carbonate Chemistry, Atmospheric CO<sub>2</sub>, and Ocean Acidification, *Annu. Rev. Earth Planet. Sci.*, 40(1), 141–165, doi:10.1146/annurev-earth-042711-105521, 2012.
- Zickfeld, K. and Herrington, T.: The time lag between a carbon dioxide emission and maximum warming increases with the size of the emission, *Environ. Res. Lett.*, 10(3), 31001, doi:10.1088/1748-9326/10/3/031001, 2015.
- 740 Zickfeld, K., MacDougall, A. H. and Matthews, H. D.: On the proportionality between global temperature change and cumulative CO<sub>2</sub> emissions during periods of net negative CO<sub>2</sub> emissions, *Environ. Res. Lett.*, 11(5), 55006, doi:10.1088/1748-9326/11/5/055006, 2016.

745

750

**Table 1:** Overview of all conducted simulations and their set-up. The “X” denotes that the respective feature is applied. Note that the applied CO<sub>2</sub> forcing follows the RCP 4.5 CO<sub>2</sub> emission scenario from 2006-2100 and the Extended RCP 4.5 CO<sub>2</sub> emissions scenario from 2100-2500. From 2500 onwards CO<sub>2</sub> emissions linearly decline until zero Gt C yr<sup>-1</sup> in year 3020.

| Simulation                         | Set-up                            |                                                     |                                                                 |
|------------------------------------|-----------------------------------|-----------------------------------------------------|-----------------------------------------------------------------|
|                                    | CO <sub>2</sub> emissions forcing | CaCO <sub>3</sub> sediment and weathering feedbacks | Direct CO <sub>2</sub> injection <sup>765</sup> at 3000 m depth |
|                                    | 2006-3020                         | 2006-3020                                           | 2020-3020                                                       |
| RCP 4.5 control run                | X                                 |                                                     |                                                                 |
| A1                                 | X                                 |                                                     | X                                                               |
| A1_Comitw                          | X                                 |                                                     |                                                                 |
| A2                                 | X                                 |                                                     | X <sup>765</sup>                                                |
| A3                                 | X                                 |                                                     | X                                                               |
| RCP 4.5 control <sub>sed</sub> run | X                                 | X                                                   |                                                                 |
| A1 <sub>sed</sub>                  | X                                 | X                                                   | X                                                               |
| A1_Comitw <sub>sed</sub>           | X                                 | X                                                   |                                                                 |
| A2 <sub>sed</sub>                  | X                                 | X                                                   | X <sup>770</sup>                                                |
| A3 <sub>sed</sub>                  | X                                 | X                                                   | X                                                               |

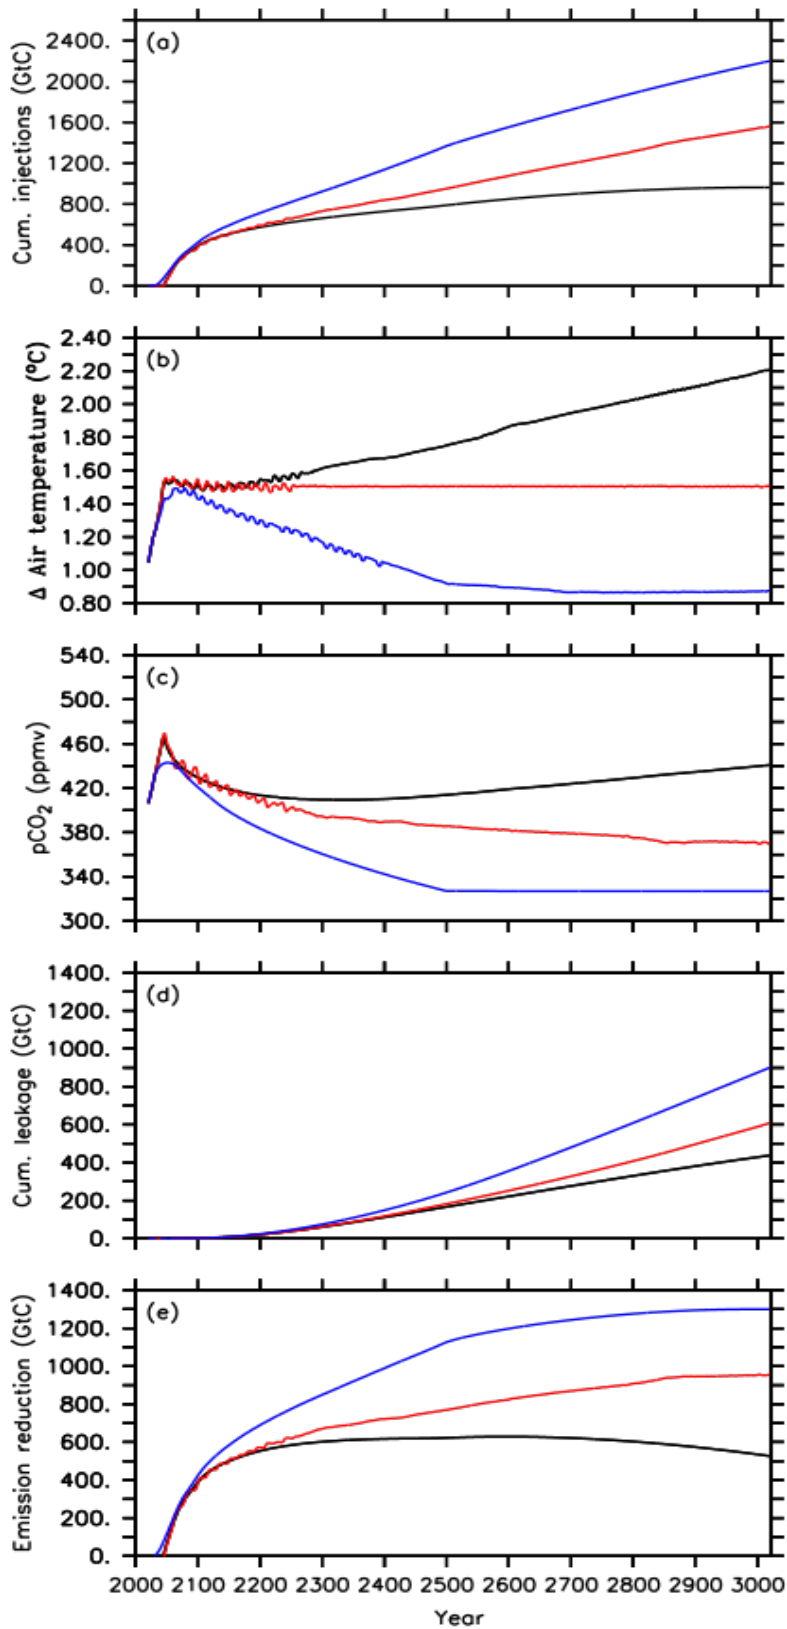

**Figure 1:** Time-series of the different default injection experiments, i.e., A1 simulation (black lines), A2 simulation (red lines) and A3 simulation (blue lines) for **(a)** cumulative CO<sub>2</sub> injections, **(b)** global mean surface air temperature, relative to preindustrial, **(c)** atmospheric CO<sub>2</sub> concentration, **(d)** cumulative leakage of injected CO<sub>2</sub>, and **(e)** required emission reduction.

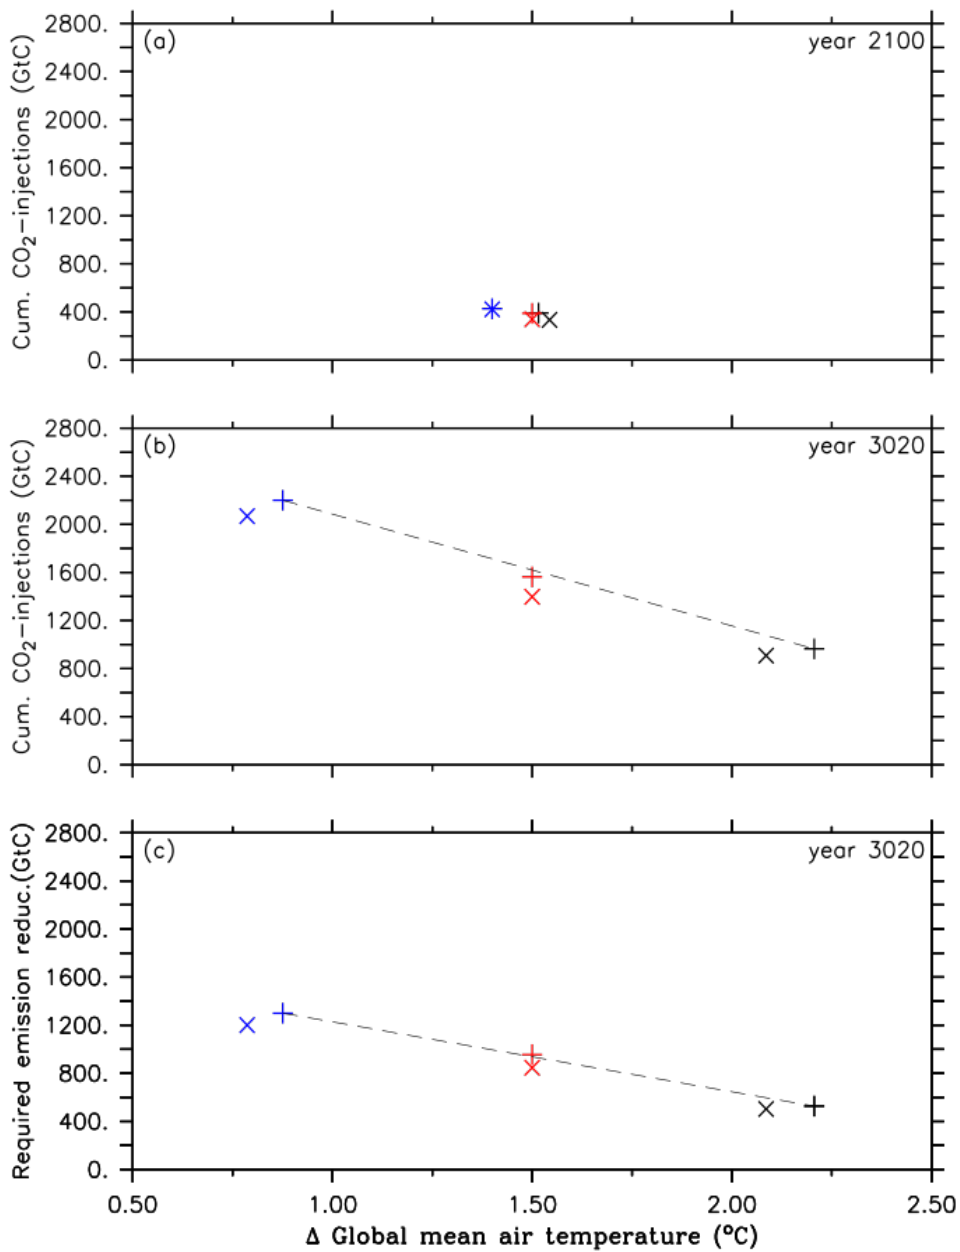

**Figure 2:** Comparison between simulations of the first approach (A1, black symbols), simulations of the second approach (A2, red symbols) and simulations of the third approach (A3, blue symbols). The cross symbols refer to the default simulations and the X symbols denote simulations with  $\text{CaCO}_3$  sediment and weathering feedbacks. These symbols represent for **(a)** cumulative  $\text{CO}_2$  injections and corresponding global mean temperature, relative to preindustrial, in year 2100 **(b)** cumulative  $\text{CO}_2$  injections and corresponding global mean temperature, relative to preindustrial, at the end of the simulation (yr 3020), and **(c)** required emission reduction and corresponding global mean temperature, relative to preindustrial, at the end of the simulations. Note that the dashed black lines are eye-fitted to the results of the standard runs.

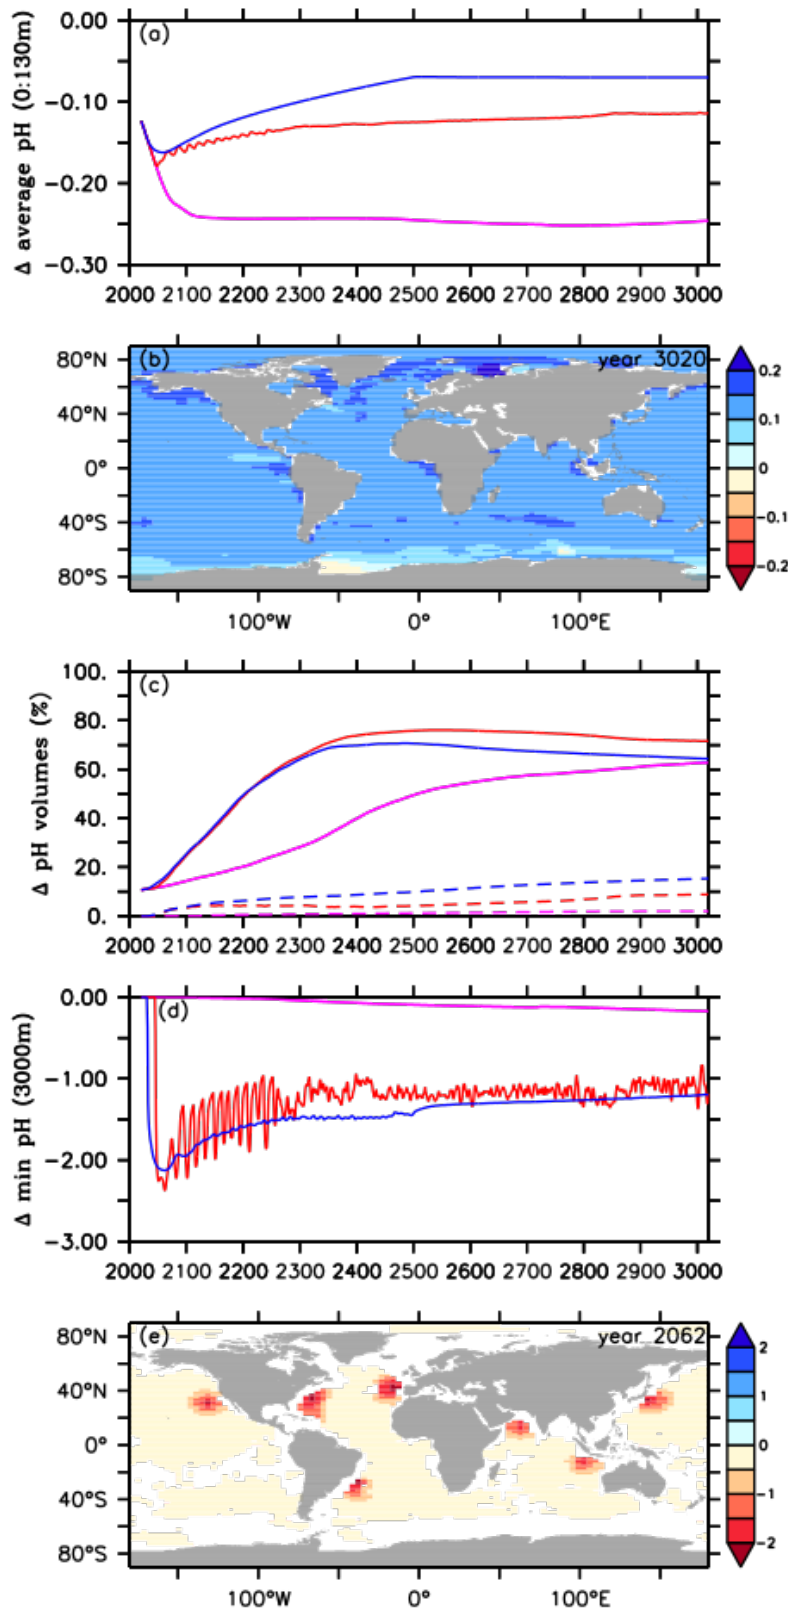

**Figure 3:** Comparison of pH values between the default RCP 4.5 control run (purple lines), the A2 simulation (red lines) and the A3 simulation (blue lines) for **(a)** average ocean surface pH (0 to 130 m depth), **(b)** difference in ocean surface pH, relative to preindustrial, between the A2 simulation and the default RCP 4.5 control run in yr 3020, **(c)** pH volumes of first ( $\leq 7.8$  and  $\geq 7.4$ , solid lines) and second category ( $< 7.4$ , dashed lines), **(d)** minimum pH values at 3000 m depth, and **(e)** difference in minimum pH at 3000 m depth between the A2 simulation and the default RCP 4.5 control run in yr 2062.



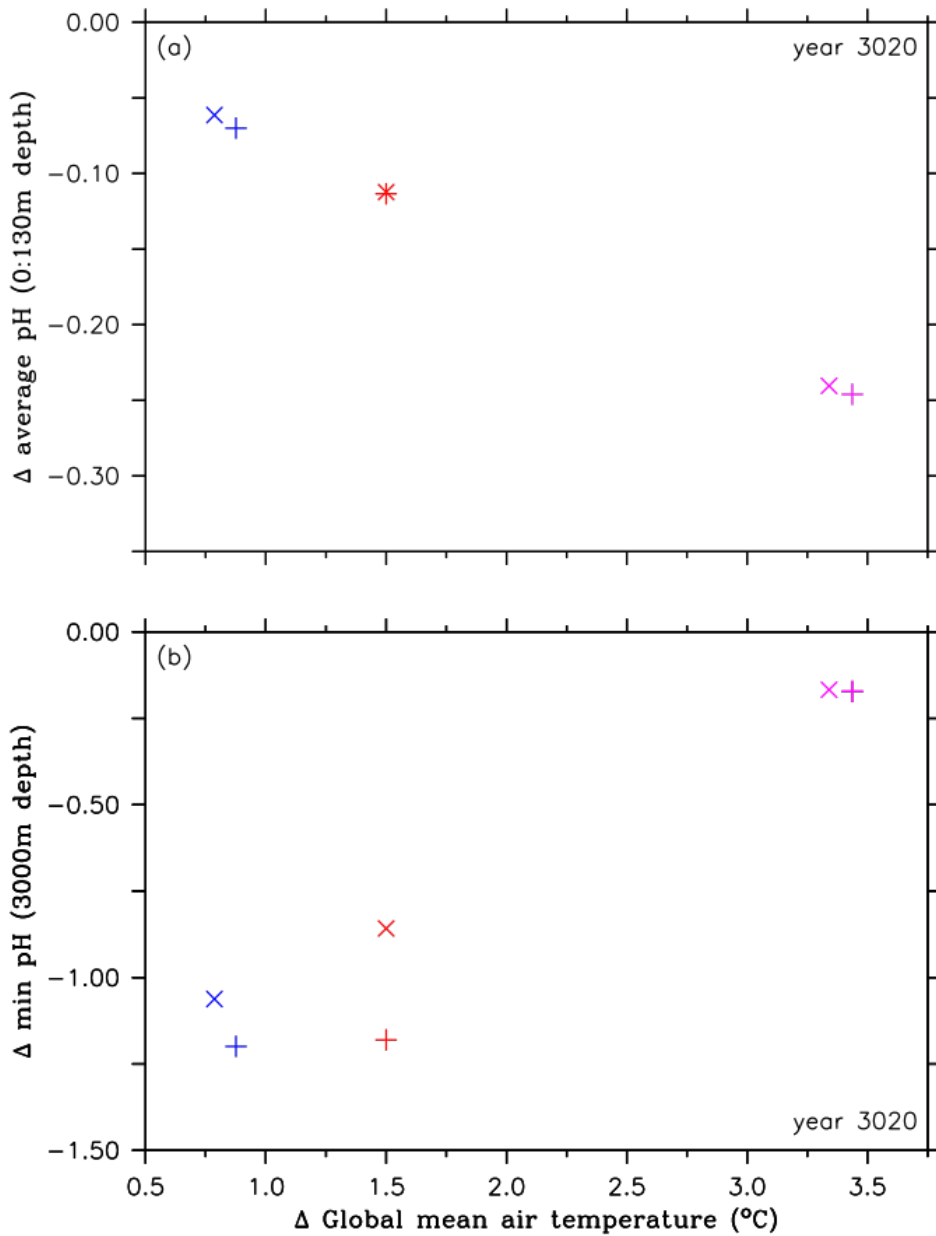

**Figure 4:** Comparison of pH values and corresponding global mean temperature in the year 3020, both relative to preindustrial, between the RCP 4.5 control simulations (purple symbols), simulations of the second approach (A2, red symbols) and simulations of the third approach (A3, blue symbols). The cross symbols refer to the default simulations and the X symbols denote simulations with  $\text{CaCO}_3$  sediment and weathering feedbacks. These symbols represent for **(a)** changes in ocean surface pH (0 to 130m depth), relative to preindustrial, and **(b)** changes in minimum pH values at 3000 m depth, relative to preindustrial.

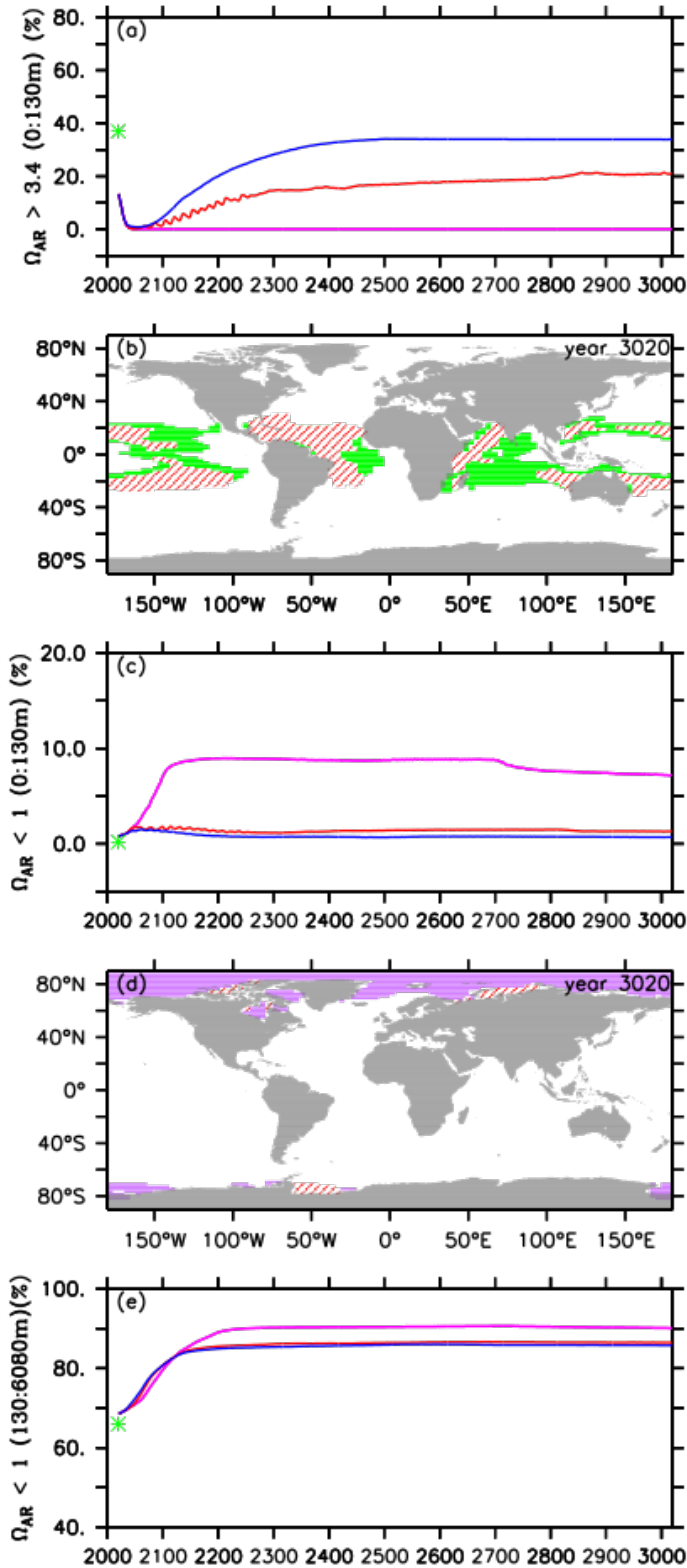

**Figure 5:** Comparison of volumes for different saturation states between preindustrial (green stars), the default RCP 4.5 control run (purple lines), the A2 simulation (red lines), and the A3 simulation (blue lines) for **(a)** omega aragonite > 3.4 in the upper ocean (0 to 130m depth), **(b)** potential coral reef habitat defined as the volume of the global upper ocean (0 to 130m depth) with omega aragonite > 3.4 and ocean temperatures between 21°C and 28°C for preindustrial (green) and the A2 simulation (red hatching) in the year 3020, **(c)** omega aragonite < 1 in the upper ocean (0 to 130m depth), **(d)** global distribution of omega aragonite < 1 for the default control run (purple) and the A2 simulation (red hatching), and **(e)** omega aragonite < 1 in the intermediate and deep ocean (130 to 6080m depth).

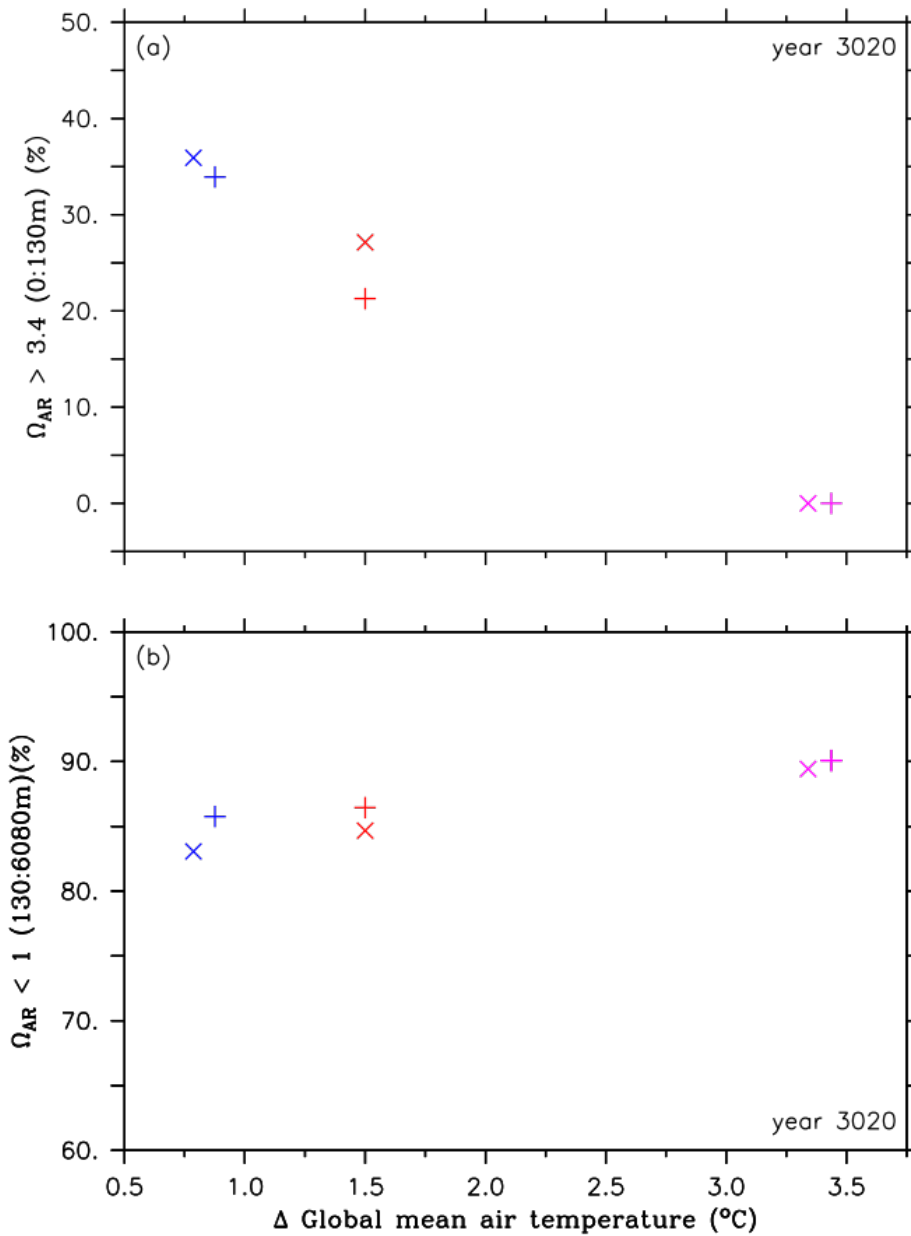

**Figure 6:** Comparison of volumes for different aragonite saturation states and corresponding global mean temperature in the year 3020, both relative to preindustrial, between the RCP 4.5 control simulations (purple symbols), simulations of the second approach (A2, red symbols) and simulations of the third approach (A3, blue symbols). The cross symbols refer to the default simulations and the X symbols denote simulations with  $\text{CaCO}_3$  sediment and weathering feedbacks. These symbols represent for **(a)** omega aragonite  $> 3.4$  in the upper ocean (0 to 130m depth), relative to preindustrial, and **(b)** changes in minimum pH values at 3000 m depth, relative to preindustrial.

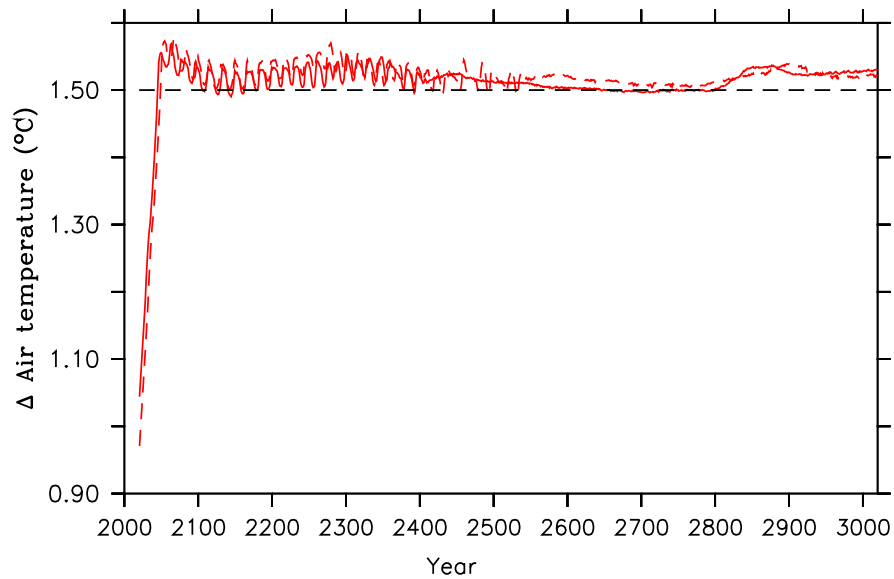

**Figure S1:** Global mean surface air temperature, relative to preindustrial, of the A1\_Comitw simulation (solid) and the A1\_Comitw\_sed run (dashed). The horizontal dashed black line denotes the 1.5°C climate target.

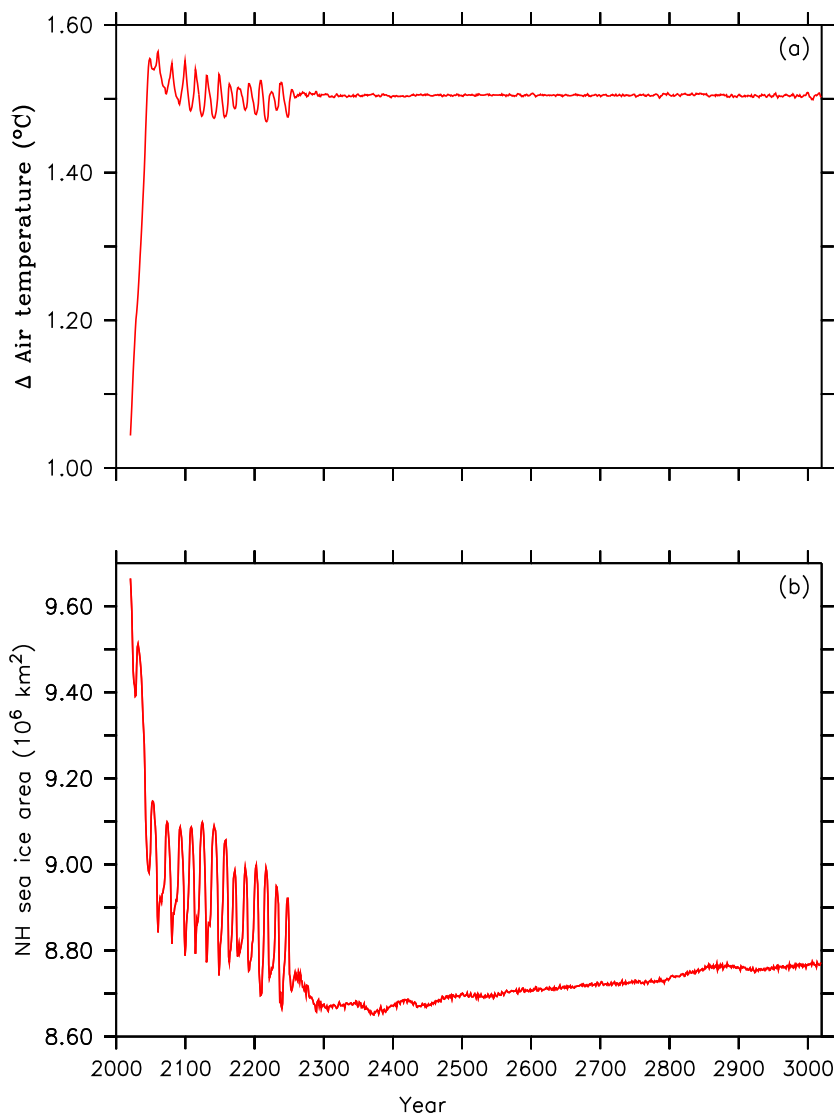

**Figure S2:** Time-series of the default A2 simulation for (a) global mean surface air temperature, relative to preindustrial, and (b) northern hemisphere (NH) sea ice area.

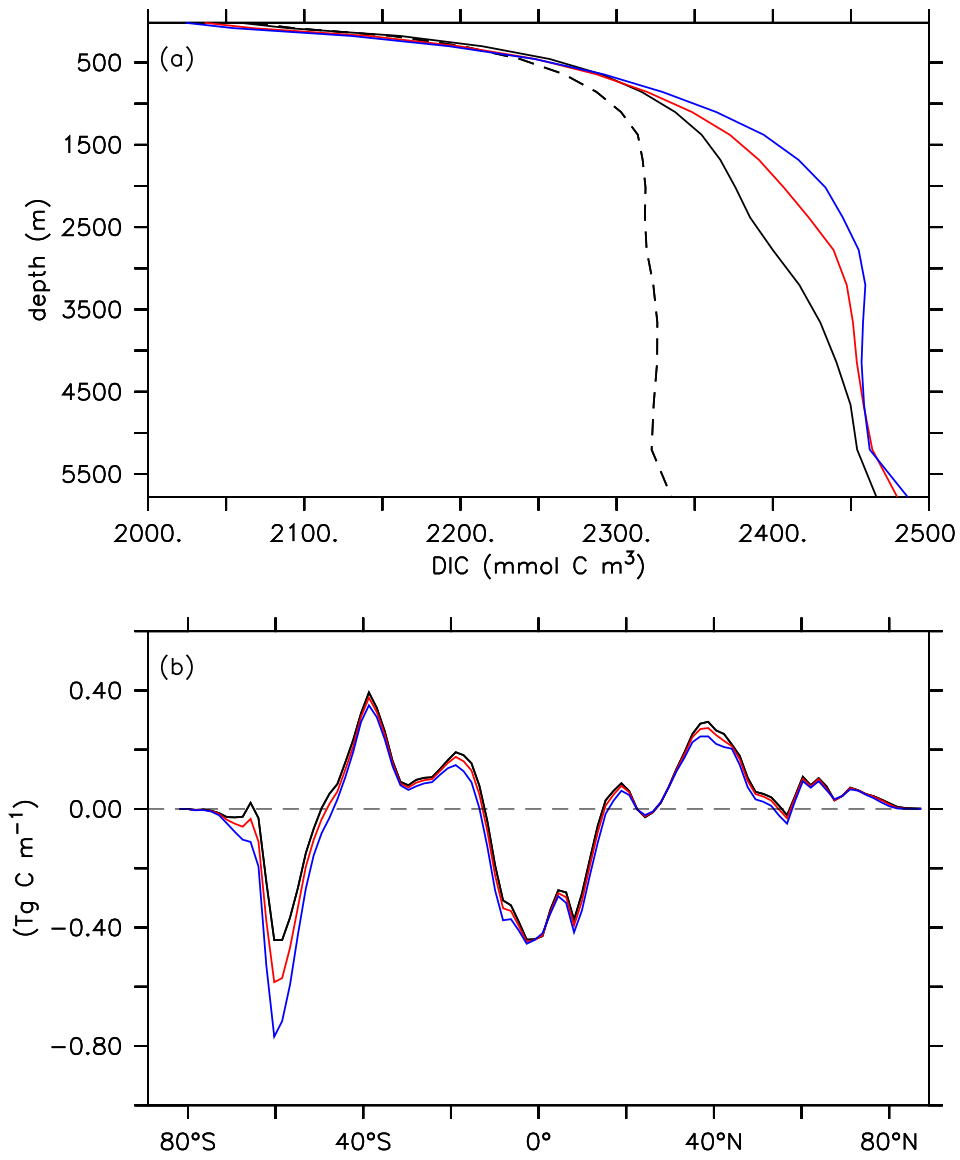

**Figure S3:** Comparison between the different default injection experiments, i.e., A1 simulation (black lines), A2 simulation (red lines) and the A3 simulation (blue lines) for **(a)** global mean profile of DIC in year 2020 (dashed black line) and global mean profiles in year 3020 (solid lines), and **(b)** cumulative atmosphere-to-ocean carbon flux in year 3020.

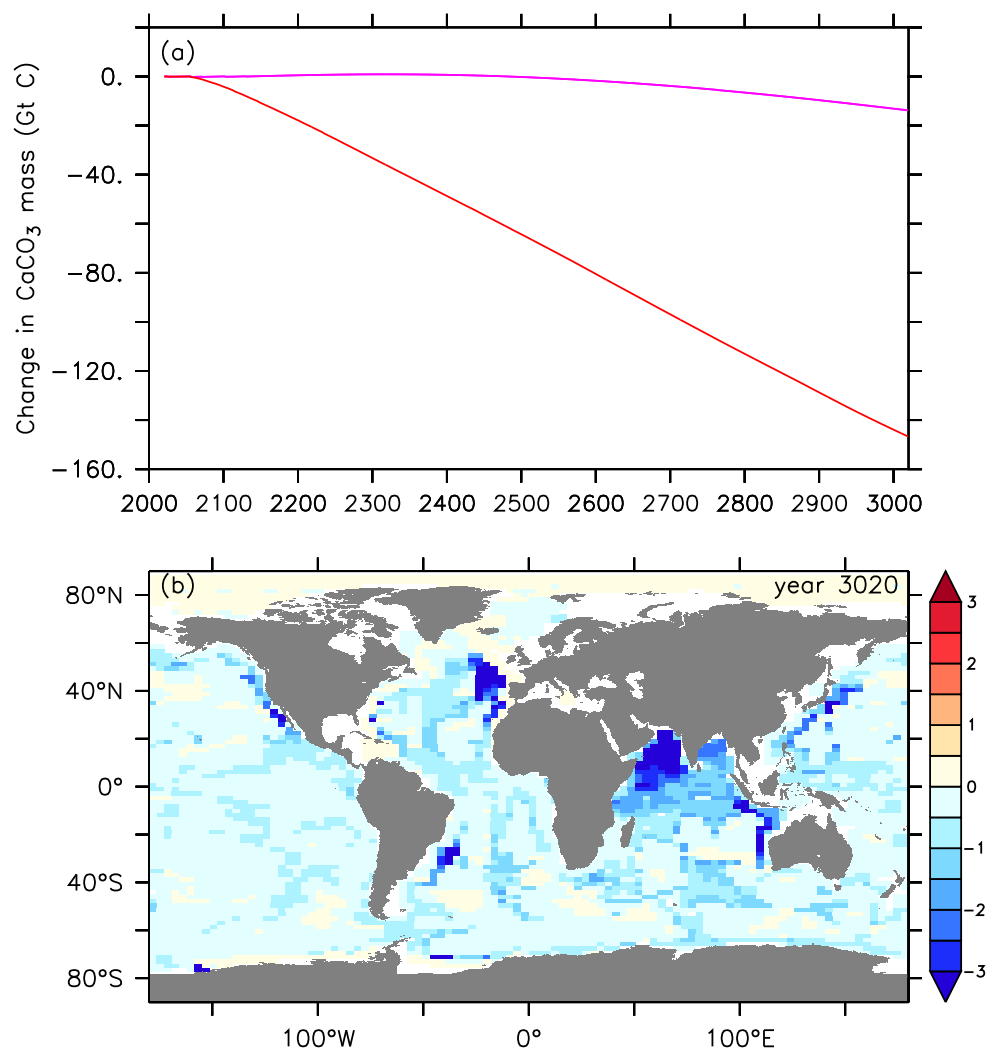

**Figure S4:** (a) Time-series of change in  $\text{CaCO}_3$  mass for the RCP 4.5 control\_sed simulation (purple line) and the A2\_sed run, relative to the year 2020, and (b) global distribution of change in  $\text{CaCO}_3$  mass ( $\text{Kg C}/\text{m}^2$ ) in the 1.5°C\_target\_sed run (year 3020 minus year 2020).

## 1. Evolution of aragonite saturation horizon

With respect to the evolution of the aragonite saturation horizon ( $\Omega_{AR}=1$ , ASH) after the beginning of the RCP 4.5 control run (Fig. S5), we observe that the ASH is mainly affected in down- and upwelling regions by the year 2100 (Fig. S6). This is caused by the deeper penetration and higher concentrations of the respective  $CO_2$  emissions (e.g., Orr et al., 2005). With respect to the *A2* experiment, we find an accelerated shoaling of the ASH in the Atlantic and smaller changes in the Pacific and Indian Ocean by the year 2100, when compared to the respective changes in the RCP 4.5 control run (Fig. S7). This can be explained by the fact that injections in the Pacific and Indian Ocean were carried out in waters already beneath the simulated ASH, which occurred at a depth of about 600 - 1200 m during the injection period (Fig. S5). This is in contrast to the Atlantic injection sites where the simulated ASH was at a depth of about 3000 m at the beginning of the simulated injections (Fig. S5), thus causing the simulated increase in the volume of undersaturated water. Consequently, the injections could have, for example, additional implications for the distribution of aragonite forming deep-sea scleractinian corals (Guinotte et al., 2006) in the Atlantic. Furthermore, it is likely that the accelerated shoaling of the saturation horizons for aragonite (and calcite) in the Atlantic due to the injections would drive a change in habitat quality for a variety of deep-sea calcifiers (Orr et al., 2005). By the end of the simulations (year 3020), we observe similar changes in the ASH in the RCP4.5 control run when compared to the *A2* experiment, although with a slightly higher shallowing of the ASH in the Pacific and Indian Ocean (Figs. S8-9). We find nearly the same evolution pattern of the ASH in the *A3* experiment (not shown).

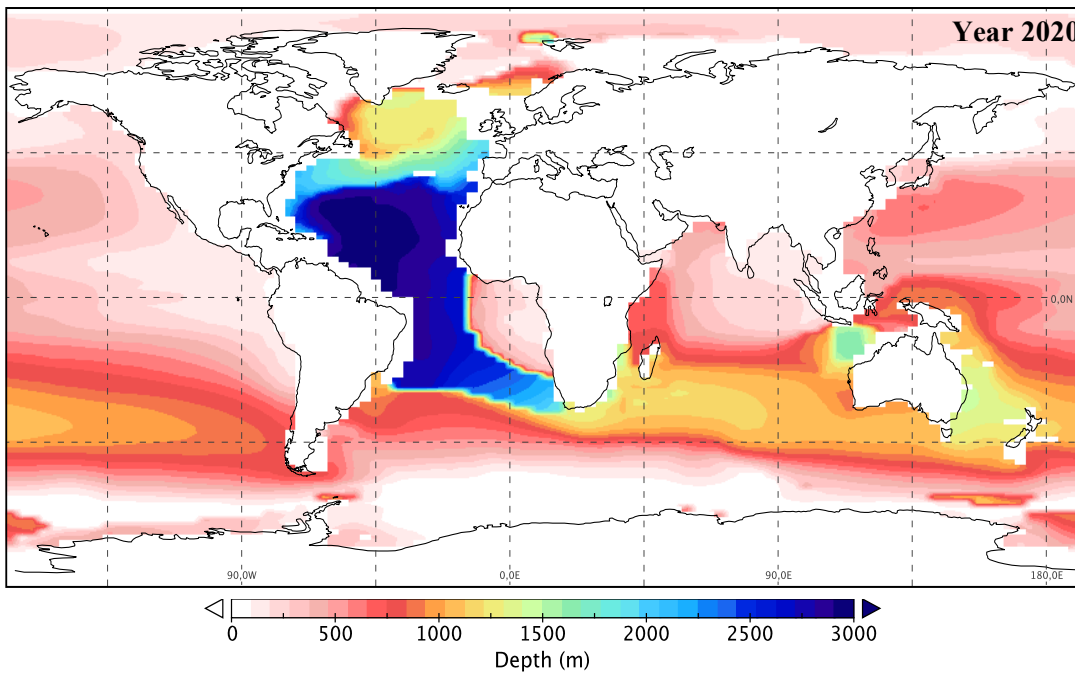

**Figure S5:** Depth of aragonite saturation horizon (ASH) at the beginning of the RCP 4.5 control run (year 2020).

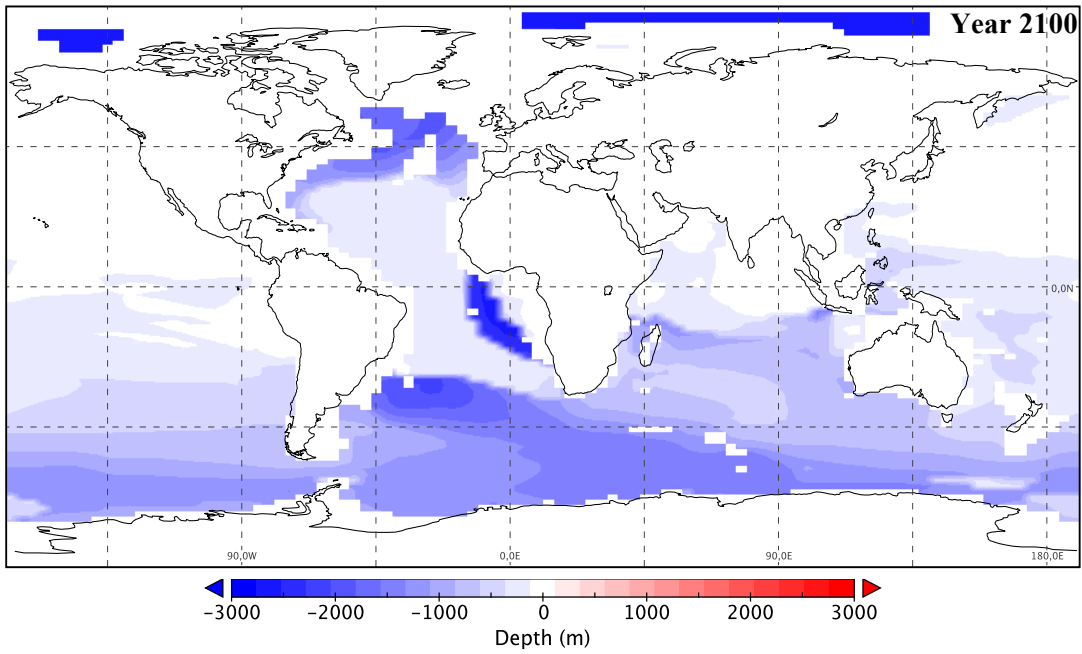

**Figure S6:** Relative changes in depth of aragonite saturation horizon (ASH) in the RCP 4.5 control run in 2100, i.e., year 2100 minus year 2020.

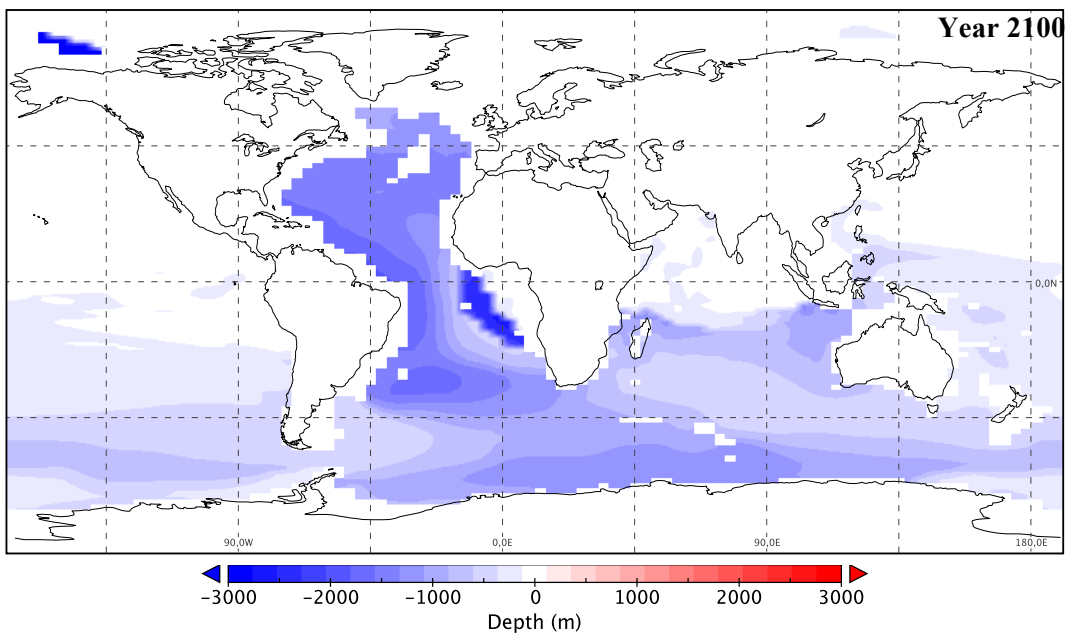

**Figure S7:** Relative changes in depth of aragonite saturation horizon (ASH) between the A2 simulation (year 2100) and the RCP 4.5 control run (year 2020).



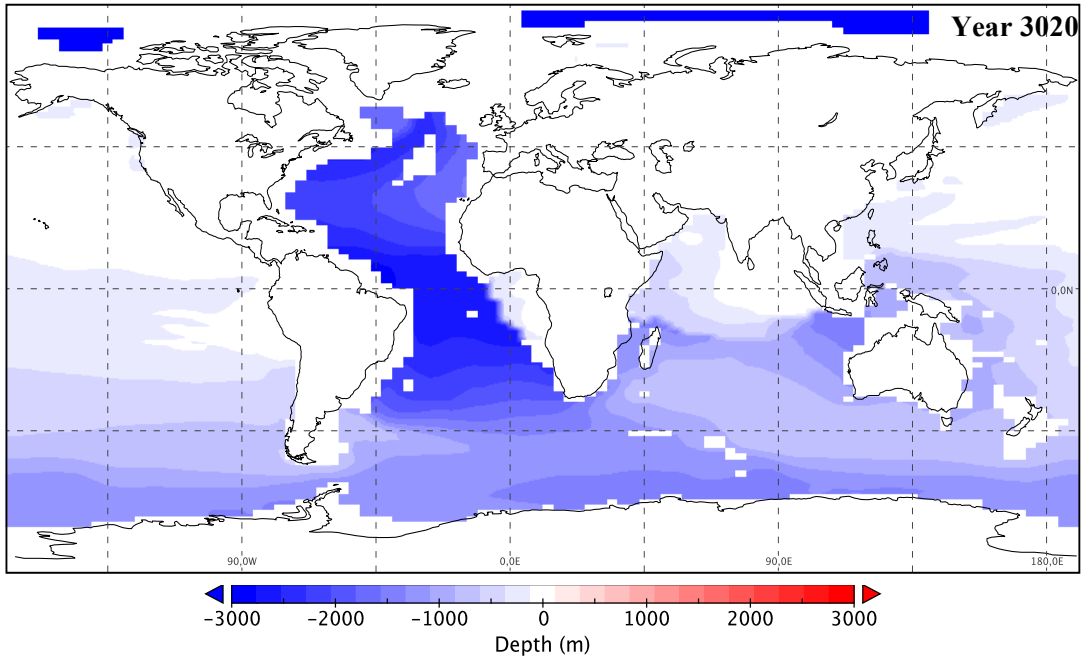

**Figure S8:** Relative changes in depth of aragonite saturation horizon (ASH) in the RCP 4.5 control run in 3020, i.e., year 3020 minus year 2020.

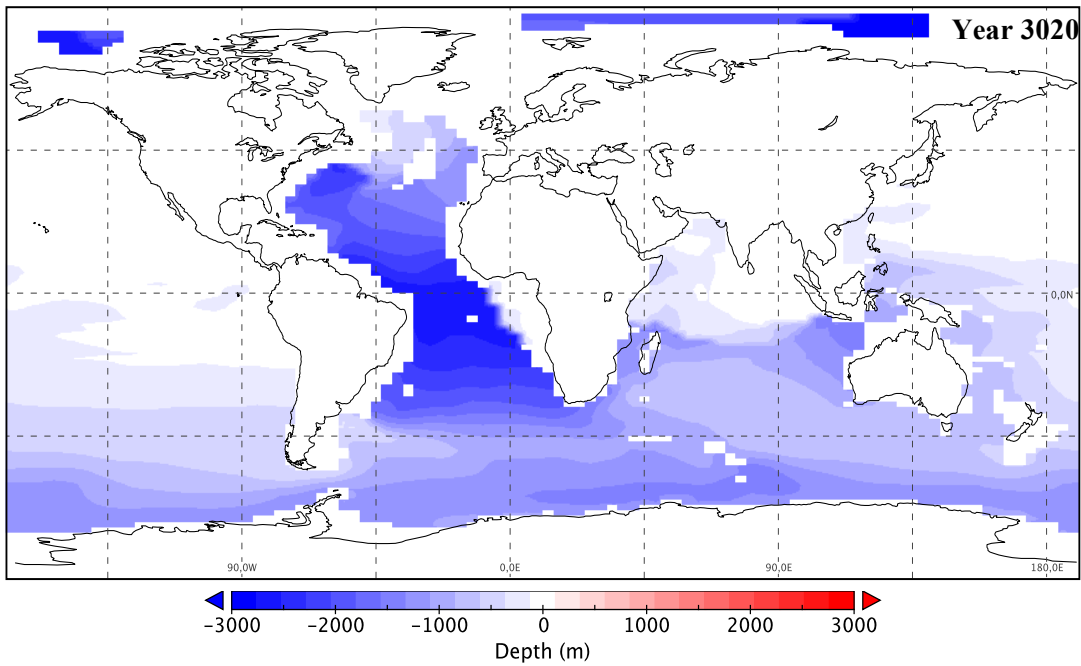

**Figure S9:** Relative changes in depth of aragonite saturation horizon (ASH) between the A2 simulation (year 3020) and the RCP 4.5 control run (year 2020).

## References:

Guinotte, J. M., Orr, J., Cairns, S., Freiwald, A., Morgan, L. and George, R.: Will human-induced changes in seawater chemistry alter the distribution of deep-sea scleractinian corals?, *Front. Ecol. Environ.*, 4(3), 141–146, doi:10.1890/1540-9295(2006)004[0141:WHCISC]2.0.CO;2, 2006.

810

Orr, J. C., Fabry, V. J., Aumont, O., Bopp, L., Doney, S. C., Feely, R. a, Gnanadesikan, A., Gruber, N., Ishida, A., Joos, F., Key, R. M., Lindsay, K., Maier-Reimer, E., Matear, R., Monfray, P., Mouchet, A., Najjar, R. G., Plattner, G.-K., Rodgers, K. B., Sabine, C. L., Sarmiento, J. L., Schlitzer, R., Slater, R. D., Totterdell, I. J., Weirig, M.-F., Yamanaka, Y. and Yool, A.: Anthropogenic ocean acidification over the twenty-first century and its impact on calcifying organisms., *Nature*, 437(September), 681–686, doi:10.1038/nature04095, 2005.

815
